1 Proteolytic processing of LRP2 on RPE cells regulates BMP activity to control eye size and  
2 refractive error.

3

4 Ross F. Collery<sup>1, 2</sup>, and Brian A. Link<sup>1, †</sup>

5

6 <sup>1</sup>Department of Cell Biology, Neurobiology and Anatomy,

7 Medical College of Wisconsin, WI 53226;

8 <sup>2</sup>Department of Ophthalmology and Visual Sciences,

9 Medical College of Wisconsin, WI 53226

10

11

12 Short title: Lrp2 cleavage and its effects on BMP signaling and eye size control

13

14 Keywords: Lrp2, SD-OCT, zebrafish, RNAseq, emmetropization, myopia

15

16 †Address correspondence to:

17 Brian A. Link, PhD

18 Department of Cell Biology, Neurobiology and Anatomy

19 Medical College of Wisconsin

20 WI 53226

21 Email: [blink@mcw.edu](mailto:blink@mcw.edu)

22 Phone: (414) 955-8072

23 FAX: (414) 955-6517

24

25 **Abstract**

26 Mutations in LRP2, a transmembrane receptor, cause ocular enlargement and high-myopia. LRP2 is  
27 expressed by the RPE and eye ciliary epithelia, binding many extracellular ligands, including Bmp4 and  
28 Shh. Signaling mediated by LRP2 is very context-dependent, and how multiple pathways are coordinated  
29 is unknown. Transcriptome analyses of ocular tissues revealed that controlled, sustained BMP signaling  
30 from the RPE is critical for normal eye growth and emmetropia (proper refraction). Using zebrafish, we  
31 demonstrate that BACE sheddase-dependent LRP2 cleavage produces a soluble domain that binds  
32 BMP4, inhibiting its signaling. We propose that controlled proteolytic cleavage of LRP2 makes two  
33 ligand-binding receptor forms available: a soluble BMP trap, and a membrane-bound RPE signaling  
34 facilitator. By modulating LRP2 cleavage, cells can fine-tune and coordinate multiple signaling pathways,  
35 as well as growth and turnover of the extracellular matrix, control of which is important to maintain  
36 proper eye size. This data supports the concept that LRP2 acts as a homeostasis node that buffers and  
37 integrates diverse signaling to regulate emmetropic eye growth.

38

39 **Author Summary**

40 For proper focusing and normal vision, the axial length of the eye needs to match the refractive  
41 power of the lens. This is achieved by fine-tuning multiple signaling pathways to regulate the shape of  
42 the eye primarily by remodeling of the sclera, the outermost layer of the eye. This process is termed  
43 emmetropization. Emmetropization cues are initiated by visual input, but how signals are transduced  
44 from the photoreceptors across the retinal pigment epithelium to the sclera is incompletely understood.  
45 Here we show that cleavage of Lrp2, a large receptor expressed on RPE cells in the eye, alters BMP  
46 signaling, which contributes to proper eye size control. Dysregulation of BMP signaling by a) absence of  
47 Lrp2 in mutant zebrafish or b) overexpression of BMP antagonists from the RPE both cause eye  
48 enlargement and myopia. Understanding how regulated cleavage of Lrp2 affects paracrine signaling  
49 provides critical insight to emmetropization, raising the possibility for development of therapeutic  
50 agents to combat the epidemic incidence of refractive error.

## 51 Introduction

52 LRP2/megalin is a large (>520 kD) transmembrane protein of the LDL-receptor related protein  
53 family that is expressed in retinal pigment epithelium (RPE) and ciliary epithelium of the eye (1–3), as  
54 well as on other absorptive epithelial cells such as proximal tubules in the kidney (4,5). Mutations in  
55 human *LRP2* lead to Donnai-Barrow syndrome, characterized by orbital hypertelorism, buphthalmia,  
56 high-grade myopia, agenesis of the corpus callosum, deafness, low molecular weight proteinuria and  
57 diaphragmatic hernia (6–8). Lrp2 binds a large number of proteins via four LDL type A domains. In the  
58 eye, Lrp2 has recently been shown to bind Sonic Hedgehog (Shh), preventing interaction with Patched1,  
59 and act as a clearance receptor to inhibit Shh signaling (9). In the absence of Lrp2, the optic cup margin  
60 shows extended proliferation, resulting in ciliary body hyperplasia. In the forebrain, however, Lrp2  
61 functions as an auxiliary receptor with Patched1 to de-repress Smoothed activity and facilitate Shh  
62 signaling (10). Loss of Lrp2 in the forebrain results in holoprosencephaly and phenocopies Shh mutants.  
63 Forebrain deletion of Lrp2 also results in augmented BMP2/4/7 signaling (11). In that study, in vitro  
64 assays demonstrated Lrp2 can bind BMP4 and facilitate lysosomal degradation of the ligand. It is  
65 therefore clear that Lrp2 impacts signaling and homeostasis in context-dependent ways. As further  
66 example of the complexity of its regulation and function, LRP2 is cleaved in cultured kidney-derived cells  
67 by regulated intramembrane proteolysis (RIP), where the intracellular C-terminal domain can enter the  
68 nucleus and regulate gene expression (12,13). However, in vivo, over-expression of the C-terminus of  
69 Lrp2 in renal proximal tubules did not alter global gene expression nor result in obvious phenotype  
70 changes (14). Potentially, then, the extracellular domain may be the relevant bioactive fragment upon  
71 proteolytic processing. Indeed, soluble forms of LRP2 corresponding to extracellular fragments have also  
72 been reported, and are likely generated through cleavage at an extracellular site (15–19). Though the  
73 extracellular Lrp2-processing enzymes have not been identified, proteolysis has been predicted to be  
74 regulated by a sheddase (12). Since LRP2-mediated endocytosis is only known to occur when

75 membrane-bound, the potential function of soluble LRP2 is unknown. In this work, we uncover a role for  
76 extracellular and soluble versus membrane-bound Lrp2 where proteolysis acts as a possible molecular  
77 switch for BMP activity. Functional roles depend on the protein state: full length Lrp2 facilitates  
78 intracellular signaling required to prevent ocular overgrowth, while the cleaved, extracellular domain  
79 antagonizes BMP signaling by acting as a ligand trap and promotes axial lengthening.

80         Myopia is the most prevalent visual disorder in the world (20,21), and one of the leading causes  
81 of blindness in many countries, especially in south-east Asia. High myopia (generally regarded as  
82 requiring more than -6.0 diopters of lens correction) elevates the risk of retinal detachment, cataract  
83 and glaucoma, as well as myopic macular degeneration, chorioretinal atrophy and staphyloma (22,23).  
84 At least 33% of adults in the US are affected by myopia (24), and preventing progression of refractive  
85 error to high myopia helps to reduce the occurrence of these secondary pathologies. There are a large  
86 number of genetic factors that contribute to onset of myopia, with many proteins associated with  
87 extracellular matrix (ECM), the visual cycle, and neuronal development (25,26). In addition, myopia is  
88 linked to environmental factors, where excessive time spent indoors without exposure to bright outdoor  
89 light levels appears to increase the risk of developing myopia (27,28). However, much remains unknown  
90 about the nature and components of signaling pathways that are dysregulated in myopia, as well as the  
91 cellular sites of action.

92         Unlike many anatomical structures, the eye has an absolute requirement for precise size control,  
93 since even small deviations in axial length have dramatic effects on refractive state. Small changes in  
94 axial length associated with genetic mutation or dysregulation of gene expression can have significant  
95 effects on refractive state, while only subtly affecting eye size. Continuous control of eye size to  
96 establish and maintain emmetropia after juvenile development has been demonstrated as necessary in  
97 all species studied (reviewed in (29)). Early post-natal eyes are ametropic, and visual cues inform the eye  
98 how to correct refractive errors. Signaling within the eye that mediates emmetropization is poorly

99 understood, both in terms of the cells involved and the precise pathways utilized. Dysregulation of these  
100 pathways however, can lead to significant refractive error.

101 Mutations in BMP4 have been associated with a spectrum of ocular disorders, including high  
102 myopia. Individuals from families that frequently presented with anophthalmia-microphthalmia, retinal  
103 dystrophy, myopia, brain malformation and poly/syndactyly were found to have a nonsense frameshift  
104 mutation in BMP4 that segregated with these symptoms (30,31). Genome wide association studies  
105 (GWAS) identified linked DNA variants located near human *BMP2* and *BMP3* in myopic individuals  
106 (25,26). In animal studies, myopia induced by form-deprivation resulted in reduced BMP signals. In  
107 chicks, induced myopia led to a reduction in BMP2 in the retina/RPE (32), while in guinea pigs, form-  
108 deprivation myopia resulted in a reduction in BMP2 and BMP5 within the sclera (33,34). Similarly,  
109 defocus-induced myopia in guinea pigs caused a decrease in BMP2 in the sclera (35), and a decrease in  
110 BMP2/4/7 in the RPE (36,37). Conversely, lens-induced hyperopia has been shown to cause an increase  
111 in BMP2/4/7 in the chick RPE (36,37). Finally, prematurely-truncating mutations in the BMP antagonist  
112 Noggin causing NOG-related-symphalangism spectrum disorder/stapes ankylosis have been associated  
113 with hyperopia (38–40). Taken together, these data indicate a strong connection between BMP signaling  
114 and refractive error, where reduced BMP levels associate with myopia or lengthening of the eye, and  
115 increased BMP levels associate with hyperopia or shortening of the eye.

116 BMP ligands are members of the TGF $\beta$  superfamily whose receptors transduce signaling events  
117 from the cell surface to activate Smad and non-Smad signaling, as well as non-transcriptional responses  
118 (for review, see (41)). Prior to binding to the transmembrane receptors, BMPs can be bound by  
119 secreted, soluble ligand trap antagonists such as Noggin, which bind BMPs and prevent interaction with  
120 their receptors by acting as antagonists (42).

121 We have previously described a zebrafish *lrp2* mutant model, which shows enlarged eyes and  
122 high myopia, as well as elevated IOP and retinal ganglion cell damage (43,44). In this work, we profile

123 gene expression in ocular tissues of wild-type and *lrp2*<sup>-/-</sup> mutants at the onset of buphthalmia. We show  
124 that eye enlargement and myopia can be ameliorated in *lrp2*<sup>-/-</sup> zebrafish mutants by expressing full-  
125 length Lrp2 in the RPE, indicating that Lrp2 acts locally within the eye to control emmetropization. We  
126 also demonstrate that Bmp4 binds to the first of the four LDL type A domains of Lrp2. To begin to  
127 address the role of cleaved and released extracellular Lrp2, we directed RPE-specific overexpression of  
128 Noggin3 (a high affinity BMP antagonist) and Gremlin2 (a lower affinity BMP antagonist). These studies  
129 showed that inhibiting BMP signaling leads to eye enlargement and myopia. Of particular relevance, we  
130 find that overexpressing a secreted version of the first LDL type A domain of Lrp2 from the RPE  
131 phenocopies the effects observed with the known BMP antagonists and exacerbates myopia in *lrp2*  
132 mutant zebrafish. We also demonstrate that extracellular cleavage of zebrafish Lrp2 occurs in cultured  
133 human cells, and find that cleavage is regulated by a beta-site amyloid precursor protein cleaving  
134 enzyme (BACE) protease. Furthermore, inhibition of BACE enzyme activity in the zebrafish eye increases  
135 Bmp signaling in the choroid/sclera, the primary region of extracellular remodeling associated with  
136 emmetropic growth. Similarly, expression of a constitutively soluble LDLA1 domain from the RPE  
137 reduces BMP activity, while expression of a membrane-bound form does not. Analysis of *lrp2*<sup>-/-</sup> and wild-  
138 type eye transcriptomes shows altered expression of ECM components. We propose that modulation of  
139 Bmp signaling, facilitated by Lrp2 and its cleavage state, contributes to controlling eye size and prevents  
140 aberrant growth and myopia.

141

142

143

144 **Results**

145 **Loss of Lrp2 results in alterations to multiple signaling pathways within the eyes**

146 Loss of function mutations of *lrp2* lead to enlarged, myopic eyes in zebrafish and other species  
147 (6,7,43,45). However, the effect of disrupting Lrp2 activity on specific signaling pathways and cellular  
148 processes has not been extensively assessed in ocular tissues. Because ocular histology and growth is  
149 normal at 1 mpf and earlier in *bugeye* fish (46), we performed transcriptome analyses at this stage to  
150 avoid potential confounding secondary and/or pathology-related pathway changes that occur in more  
151 aged animals. Specifically, we isolated RNA from 1 mpf wild-type and *lrp2*<sup>-/-</sup> eyes, as well as dissected  
152 ocular tissues (sclera/choroid, RPE, retina), where each condition was replicated in triplicate with  
153 independent biological samples. RNA extracted from these samples was assayed for tissue specificity  
154 using retinal-, RPE- or sclera/choroid-specific marker genes by qPCR (S1 Figure), and then processed for  
155 deep RNA sequencing (RNAseq) (S1 Table, S2 Table). Subsequent bioinformatic analysis was applied to  
156 detect potential changes in signaling pathways associated with loss of Lrp2.

157 Using curated databases, such as Gene Ontology, DAVID, KEGG, and IPA, for transcript signatures  
158 associated with different types of signaling, we assessed whether genes altered by loss of Lrp2  
159 correlated with those of specific pathways. Analyses indicated that Bmp and Shh signaling were both  
160 altered in *lrp2* mutant eyes (S3 Table). However, expression signatures associated with these databases  
161 are assembled from published data derived from non-ocular tissues of non-zebrafish origin. Since Bmp  
162 and Shh signaling pathways are strongly associated with control of eye size and development, and both  
163 have been previously shown to be regulated by Lrp2, we generated ocular-specific, zebrafish transcript  
164 signatures for Bmp and Shh. This was accomplished by using transgenic zebrafish lines to acutely  
165 overexpress either Shha or Bmp4 under inducible heat-shock control. At 5 dpf, lines *hsp70l:shha-eGFP*  
166 (47), or *hsp70l:eGFP-bmp4* (this study) were heat-shocked before isolation of GFP-positive eyes 8 hours



167 later. RNA expression profiles from these eyes were used to define zebrafish ocular responses to Shh  
168 and Bmp pathway activation (S2 Figure, S3 Figure).

169 These signatures were used to carry out gene-set enrichment analysis (GSEA) and assess overlap of  
170 the gene sets in *Lrp2*-deficient ocular tissues (see below). GSEA examines transcriptome datasets to  
171 determine whether a defined list of genes (referred to as signatures or commonly-regulated gene sets)  
172 is concordantly and statistically altered between control and experimental groups (48,49). Specifically,  
173 RNA profiles of whole eye and dissected ocular tissues from 1 mpf wild-type and *lrp2*<sup>-/-</sup> mutant zebrafish  
174 were compared to eye-specific Bmp4 and Shh reference gene sets. Both pathways were significantly  
175 altered in the absence of *Lrp2*. To prioritize the gene pathway and eye tissue of greatest importance, we  
176 applied a simple scoring system to assess the significance of *Lrp2* for each pathway in specific eye tissues  
177 (Table 1). For each sample assessed, nominal GSEA p-values lower than 0.05 were scored as +1, while p-  
178 values greater than 0.05 were scored as 0. The final scores were summed and used to rank significance  
179 of each signaling pathway in each tissue. We found the Shh pathway was broadly affected and scored  
180 highest for whole eyes. Bmp pathway genes were more selectively altered within the RPE, but also  
181 showed changes in the sclera/choroid and neural retina. Because Shh has already been studied in the  
182 context of eye size regulation using mice (9), and RPE is known as a key signaling tissue for  
183 emmetropization and thought to mediate signals processed in the sclera and choroid, we concentrated  
184 our analysis on Bmp signaling associated with those tissues.

185

### 186 **RPE-driven expression of *Lrp2* partially rescues the buphthalmic *bugeye* phenotype**

187 To investigate whether buphthalmia was caused by absence of *Lrp2* from the eyes, which is  
188 expressed in the RPE, or by systemic changes in circulating ligands normally bound by *Lrp2* in the kidney  
189 and elsewhere, we developed an RPE-specific promoter to express *Lrp2* only in that tissue. Similar to  
190 studies using mammalian *RPE65*, we isolated approximately 800 bp upstream of the translational start

191 site of zebrafish *rpe65a* (50). We found that this promoter drove fluorescent transgene expression in  
192 developing and adult RPE and pineal (Figure 1). In embryos, *rpe65a:eGFP* transgenic expression was  
193 broad, but low. In larvae, we observed strong enrichment of fluorescent expression in developing RPE  
194 cells starting just prior to when they resolve to a monolayer (51). Subsets of cells within the pineal also  
195 showed enriched eGFP expression. In adult zebrafish, eGFP expression was maintained and restricted to  
196 the RPE and pineal.

197 We next isolated the full-length zebrafish *lrp2* coding sequence and generated transgenic lines  
198 expressing both *rpe65a:Gal4* and DsRed  $\leftarrow$ UAS  $\rightarrow$ Lrp2-HA (abbreviated to *rpe65a>lrp2-HA*). This  
199 transgenic line uses the *rpe65a* promoter to drive Gal4 expression, which transactivates the upstream  
200 activating sequence (UAS) bi-directionally so that fluorescent DsRed marks cells co-expressing Lrp2-HA.  
201 At 3 mpf, wild-type and *lrp2*<sup>-/-</sup> fish with or without RPE-driven Lrp2-HA expression were examined using  
202 spectral domain - ocular coherence tomography (SD-OCT) to assess eye size relative to body axis and  
203 calculate the relative refractive error, a measure of deviation from emmetropia. This imaging technique  
204 allows for precise measurements in live samples, avoiding tissue fixation artifacts and enabling detection  
205 of the small differences in axial length that have major impact on visual blur (52). Adult *lrp2*<sup>-/-</sup> mutant  
206 zebrafish carrying the *rpe65a>lrp2-HA* transgenes had significantly smaller eyes (lower eye axial length:  
207 body axis ratios) than non-transgenic, mutant siblings (Figure 2 A). However, *lrp2*<sup>-/-</sup> *rpe65a>lrp2-HA* eyes  
208 still had significantly larger eyes than wild-type controls. Likewise, *lrp2*<sup>-/-</sup> adult zebrafish carrying the  
209 *rpe65a>lrp2* transgenes had significantly reduced relative refractive errors (less myopic) when compared  
210 to non-transgenic, mutant siblings (Figure 2 B). Similar changes were measured in replicate experiments.  
211 Furthermore, expressing Lrp2 directly from the *rpe65a* promoter also resulted in abatement of enlarged  
212 eyes and myopia (data not shown). Importantly, the *rpe65a* promoter does not show activity within the  
213 ciliary margin zone (Figure 1 G), and so the rescue measured is due only to RPE cell expression and not

214 from the ciliary region, which is known to have strong Shh activity. In summary, this data indicate that  
215 RPE-expressed Lrp2 contributes to regulation of eye growth and emmetropization.

216

### 217 **eGFP-Bmp4 is functional and perdures in discrete locations during development**

218 Because eye size and refraction were rescued by RPE-expression of Lrp2 within *lrp2* mutants,  
219 and *lrp2* mutant RPE showed defects in BMP signaling, we sought to explore more directly the  
220 relationship of Lrp2 and BMP activity using an eGFP-tagged Bmp4. To validate that eGFP-Bmp4 was  
221 functional, we generated a transgenic line, *hsp70l:eGFP-bmp4*, that placed the Bmp4 fusion protein  
222 downstream of a heat shock-inducible promoter, allowing activation of eGFP-Bmp4 expression at  
223 various times during development. Heat-induced eGFP-Bmp4 expression was verified by Western blot  
224 (S4 Figure). Secretion and activity was confirmed by inducing global eGFP-Bmp4 expression at 30 – 50%  
225 epiboly, which resulted in extracellular eGFP and severe ventralization phenotypes, similar to the  
226 patterning defects observed in zebrafish following overexpression of native Bmp at these early times  
227 (53).

228 At embryonic stages after axis patterning, expression of eGFP-Bmp4 resulted in milder  
229 phenotypes. Expression induced at 1, 2, 3 or 4 dpf followed by image analysis 24 hours later revealed  
230 patterns of perdurance of eGFP-Bmp4. Stabilized eGFP-Bmp4 was enriched in cells of the eye, head,  
231 somites and other areas (S4 Figure). Despite the mild phenotypic consequences at later stages, eGFP-  
232 Bmp4 expression did stimulate Smad signaling, as shown by elevated red fluorescence from the  
233 BRE:dmKO2 reporter (54). These data verify the bioactivity of eGFP-Bmp4.

234 Given the association between Bmp4 levels and refractive state of the eye, we attempted to  
235 overexpress Bmp4 from the RPE. To do so, we generated a *UAS:eGFP-bmp4* transgenic line to combine  
236 with the *rpe65a:Gal4* transgene and achieve sustained RPE-derived overexpression of eGFP-Bmp4.  
237 However, *rpe65a* and our promoter transgene expresses broadly during early development before it

238 becomes confined to the RPE and pineal, resulting in severe microphthalmia ((55), this study).  
239 Interestingly, these embryos often developed into adults with abnormal phenotypes restricted to the  
240 eyes, including coloboma and disorganization of the retina (S5 Figure). Since the eyes did not develop  
241 correctly, we were unable to use this strategy to isolate the effects of Bmp4 overexpression on ocular  
242 size and the refractive state.

243

#### 244 **Overexpression of BMP ligand-trap antagonists from the RPE alter eye size and cause myopia**

245 To test whether BMP activity associated with the RPE is critical for eye growth and  
246 emmetropization, we overexpressed the potent Bmp antagonist zebrafish Noggin3 (Nog3) from that  
247 epithelium. We initially tried to create a double transgenic line that bi-directionally expresses *DsRed*←  
248 *UAS*→*nog3* within a stable *rpe65a:Gal4* line. Despite repeated attempts, we were unable to establish  
249 founder fish that gave rise to offspring transgenic for both constructs, likely due to deleterious effects of  
250 expressing Noggin3 broadly during early development, as was the case for Bmp4 overexpression (S5  
251 Figure). Instead, we injected the plasmid carrying the *DsRed*←*UAS*→*nog3* sequence into *rpe65a:Gal4*  
252 embryos (either *lrp2*<sup>+/+</sup> as sibling controls, or *lrp2*<sup>-/-</sup> mutants) and screened for red fluorescence  
253 expression in RPE cells at 5 dpf. These fish, abbreviated *rpe65a>nog3*, were raised to adulthood, and eye  
254 and body metrics measured at 2 months.

255 Overexpression of Nog3 in RPE of *lrp2*<sup>-/-</sup> zebrafish exacerbated the enlarged eye phenotype and  
256 enhanced the degree of myopia as compared to non-transgenic siblings that were also mutant for *lrp2*  
257 (Figure 3 A, B). Interestingly, overexpression of Nog3 in *lrp2*<sup>+/+</sup> zebrafish, which are indistinguishable  
258 from wild-type fish, induced eye enlargement and refractive errors. These results show that RPE-based  
259 overexpression of Nog3 increases the degree of myopia in *lrp2*<sup>-/-</sup> adult zebrafish, and causes myopia in  
260 *lrp2*<sup>+/+</sup> zebrafish that are otherwise slightly hyperopic.

261

262 To complement the Noggin3 studies and attempt to generate stable transgenic fish capable of  
263 expressing a BMP antagonist, we tested the effects of a weaker BMP-binding inhibitor, Gremlin2, on eye  
264 size and refractive state. Indeed, we were able to generate double transgenic lines of *rpe65a:Gal4*;  
265 *DsRed←UAS→grem2* (abbreviated to *rpe65a>grem2*). These fish overexpress Grem2 from the RPE, and  
266 show normal survival and fertility. Overexpression of Grem2 from *lrp2<sup>-/-</sup>* RPE cells increased the relative  
267 ocular axial length (Figure 3 C). The mean relative refractive error was also significantly affected (Figure  
268 3 D). However, in *lrp2<sup>+/-</sup>* zebrafish, overexpression of Grem2 did not significantly alter eye size or impact  
269 the refractive state. Cumulatively, these data are consistent with the concept that modulation of BMP  
270 signaling within the RPE and adjacent tissues can regulate ocular growth and emmetropization.

271

#### 272 **Bmp4 binds to the LDLA1 domain of Lrp2 in vivo**

273 Bmp4 has previously been shown to bind purified Lrp2 in vitro, though the site of interaction has  
274 not been discovered, and direct interaction has not been verified on cells (56). The extracellular portion  
275 of Lrp2 can be divided into four domains, characterized by LDLA motifs. We generated four expression  
276 vectors corresponding to the isolated LDLA domains 1-4, and individually fused each domain with an  
277 S•tag epitope in plasmids CMV/SP6:LDLAn-S•tag, where n corresponds to LDLA domain 1, 2, 3 or 4. In  
278 addition we constructed an epitope-tagged Bmp4 to investigate whether, and to which domain of Lrp2,  
279 BMP4 binds in vivo (S4 Figure).

280 Zebrafish Lrp2 LDLA domains 1 through 4 were transfected along with eGFP-tagged Bmp4 into  
281 HEK293T cells. LDLA domains were immobilized from conditioned medium and extracted cellular  
282 proteins before probing for bound eGFP-Bmp4 by Western blot. Comparing total input protein against  
283 protein retained after immunoprecipitation showed that eGFP-Bmp4 binds to the LDLA1 domain, but  
284 not to LDLA domains 2, 3 or 4 (Figure 4). Importantly, binding of ligands to extracellular regions of Lrp2,

285 which may be cleaved from the cell surface, suggests that Lrp2 might act as a ligand trap as well as an  
286 endocytic receptor.

287

288

289

### 290 **RNAseq shows altered gene signaling in dissected eye tissues of *lrp2*<sup>-/-</sup> and wild-type**

291 To evaluate which Bmp ligands and receptors are available for signaling in the RPE and adjacent  
292 tissues, we evaluated RNAseq data from wild-type 1 mpf eyes and dissected tissues (S6 Figure). Most  
293 Bmp ligands were more highly expressed in RPE and choroid/sclera than retina or whole eye (one-way  
294 ANOVA with Tukey's multiple comparison test), though we note that *bmpr2a*, *bmpr2b* and *acvr2aa* are  
295 more highly expressed in the retina than elsewhere. The Bmp receptors *bmpr1ab* and *bmpr1ba* were  
296 more highly expressed in the RPE than other tissues, and *bmpr1ab* was also enriched in the  
297 sclera/choroid. Activin receptors, which can also transduce Bmp signals as well as other TGFβ  
298 superfamily signals, were more broadly expressed in all eye tissues, though *acvr1/alk1* and  
299 *acvr1/alk2/alk8* were enriched in the RPE. We note that Bmp type II receptors (*bmpr2a*, *bmpr2b*) can  
300 complex with Alk1 (AcvrL1) and Alk2 (Acvr1) as well as Bmp type I receptors, and it may be that TGFβ  
301 signaling unrelated to Bmp signaling is the reason for high levels of *bmpr2a* and *bmpr2b* in the retina.  
302 Taken together, these data suggest that Bmps are important for signaling between the RPE and  
303 sclera/choroid, consistent with a model in which Bmp activity mediates the ability of RPE to direct  
304 emmetropic remodeling of the sclera/choroid.

305

### 306 **Secretion of the LDLA1 domain of Lrp2 from the RPE increases myopia in an *lrp2*<sup>-/-</sup> zebrafish**

307 Because full-length Lrp2 overexpression reduced the large eye phenotype in *lrp2*<sup>-/-</sup> zebrafish,  
308 and Bmp4 bound only to LDLA1, we wanted to test whether expression of the LDLA1 domain alone from

309 the RPE was sufficient to rescue the *bugeye* phenotype. We placed DNA encoding the LDLA1 domain  
310 downstream of the native Lrp2 signal peptide to ensure proper export of the resulting protein. Using this  
311 plasmid, we made the following transgenic line: *DsRed*←*UAS*→*Lrp2,signal peptide-LDLA1* (abbreviated to  
312 *rpe65a>LDLA1*). These fish were combined with *rpe65a:Gal4* carriers to overexpress the secreted N-  
313 terminal domain of Lrp2 (signal peptide-LDLA1) from the RPE. Double transgenic progeny grew to  
314 maturity and were fertile. Overexpression of the Lrp2 LDLA1 domain from the RPE of *Lrp2*<sup>-/-</sup> mutants  
315 increased both the normalized eye size and relative refractive error compared to mutant siblings that  
316 only expressed Gal4 (Figure 5 A, B). However, overexpression of LDLA1 did not significantly affect the  
317 eyes of *Lrp2*<sup>+/-</sup> zebrafish. These results show that overexpression of RPE-secreted Lrp2 LDLA1 domain  
318 increases the degree of myopia in *Lrp2*<sup>-/-</sup> adult zebrafish, similar to the results found with overexpression  
319 of either Nog3 or Grem2.

320

### 321 **Lrp2 is cleaved extracellularly to release a soluble domain**

322 Replacement of full-length Lrp2 in the *Lrp2* mutant RPE reduces the severity of the buphthalmic  
323 phenotype; however, overexpression of the secreted, Bmp4-binding domain exacerbates eye  
324 enlargement. This suggests that soluble Lrp2 has a different function versus membrane-bound Lrp2, and  
325 that release of the extracellular domain by proteolytic cleavage may act as a functional switch. In the  
326 eye, proteolysis of Lrp2 may serve to fine-tune signaling that controls emmetropization. In cultured  
327 proximal tubule cells of the kidney, LRP2 has been shown to be cleaved to produce a soluble  
328 extracellular N-terminal domain and an intracellular C-terminal domain. To examine the possibility of  
329 extracellular cleavage of zebrafish Lrp2, and investigate the factors that modulate this event, we  
330 generated a plasmid that placed secreted eGFP (*seGFP*) upstream of a 691 amino acid fragment of Lrp2  
331 (457 a.a. extracellular domain + 234 a.a. of the full transmembrane and intracellular domains), and  
332 placed mCherry at the C-terminus to make *seGFP-lp2 (ECD/ICD)-mCherry* (Figure 6 A). This dually-tagged

333 *lrp2* fragment was put under the control of a CMV promoter and expressed in HEK293T cells.  
334 Conditioned culture medium was harvested after 48 hours following transfection of the plasmid and the  
335 Lrp2 epitopes were probed by Western blot. As controls, *seGFP-V2A-mCherry* (constitutive cleavage)  
336 and *seGFP-mCherry* (no cleavage) were also placed under the control of the CMV promoter and  
337 transfected into equivalent batches of cells.

338 To investigate regulation of extracellular cleavage, and to gain insight into the class of proteases  
339 that might mediate cleavage, we used pharmacological agents known to affect the activity of different  
340 classes of sheddases. The plasmid *CMV:seGFP-Lrp2 (ECD/ICD)-mCherry* was transfected into HEK293T  
341 cells for 24 hours, before cells were treated with a variety of compounds that either inhibit or promote  
342 extracellular cleavage of LDL receptor family members. To inhibit sheddases, matrix metalloprotease  
343 inhibitor III, TAPI-0 or LY2811376 were used to block activity of matrix metalloproteases, TNF- $\alpha$   
344 converting enzyme (TACE)/ADAM17, and BACE1, respectively. To augment sheddase activity we added  
345 phorbol 12-myristate 13-acetate (PMA) and sodium maleate, which are known to stimulate cleavage of  
346 amyloid precursor protein. Transfected cells were treated with compounds for 24 hours before  
347 conditioned medium was collected. Conditioned medium from each group was applied to anti-GFP-  
348 conjugated agarose to bind any Lrp2 that may have been released into the medium through cleavage  
349 (*seGFP-Lrp2 ECD*), or potentially exocytosis or cell lysis (*seGFP-Lrp2 (ECD/ICD)-mCherry*) (Figure 6B).  
350 Bound proteins were eluted from the agarose and detected by Western blotting using anti-eGFP  
351 antibody (JL-8). Of the compounds tested, only LY2811376 altered the amount of eGFP-containing  
352 proteins in the medium, suggesting that BACE1 (or a similar enzyme that is also inhibited by LY2811376)  
353 mediates extracellular cleavage of Lrp2 (Figure 6 C). To further confirm BACE1-mediated cleavage of  
354 Lrp2, the experiment was repeated in duplicate, with culture medium collected before (24 hours after  
355 transfection) and after (48 hours after transfection) drug administration (Figure 6 D). Following  
356 LY2811376 treatment, when the amount of eGFP-containing proteins was normalized to pre-drug levels,



357 there was an ~40% average reduction in extracellular cleavage observed (Figure 6 E). These results  
358 indicate that release of the extracellular region of zebrafish Lrp2 is mediated in part by a BACE1-like  
359 activity, and the responsible protease(s) may modulate Lrp2 function in vivo. Consensus substrate sites  
360 for BACE enzymes have been published, and comparisons with zebrafish Lrp2 protein sequence suggests  
361 several sites for BACE enzyme activity (S7 Figure). Our results so far suggest that BACE enzyme(s) are  
362 capable of extracellular cleavage of ectopically expressed Lrp2 and the released LDLA1 domain can bind  
363 Bmp and affect signaling.

364

365

#### 366 **Inhibition of BACE activity increases Bmp signaling in tissues basal to the RPE**

367 We next tested whether inhibiting BACE activity affects Bmp signaling in vivo using zebrafish. To  
368 inhibit BACE activity, we used two potent compounds, LY2811376 and BACE inhibitor II. Larval zebrafish  
369 transgenic for the Bmp-response element:d2GFP (*BRE:d2GFP*) express destabilized GFP to report the  
370 location and level of Bmp signaling in vivo (57). *BRE:d2GFP* larvae were treated at 4 dpf for 24 hours  
371 with a) 150  $\mu$ m LY2811376 (BACE1 inhibitor), b) 50  $\mu$ m BACE inhibitor II, or c) DMSO vehicle as control.  
372 At 4 dpf, zebrafish eyes show highest Bmp activity in the outermost layers (RPE, choroid, sclera) (Figure  
373 7A). Following drug or vehicle treatment, eyes of *BRE:d2GFP* larvae were imaged by fluorescent  
374 microscopy and the signal in the outer layers of the eye was quantified. BACE inhibitor drug treatments  
375 led to higher levels of Bmp signaling in outer layers of reporter zebrafish when compared to vehicle  
376 controls for both LY2811376 and BACE inhibitor II (Figure 7 A, B, F, G).

377 To clarify the specific identity of the outer layers of the eye demonstrating augmented Bmp signaling  
378 in response to BACE inhibition, we incrossed *BRE:d2GFP* and *rpe65a:mCherry-CAAX* zebrafish and  
379 examined doubly transgenic larvae at 4 dpf. Green fluorescent tissue layers were found to lie outside

380 the red fluorescent marked RPE layer (Figure 7 C - E), indicating that the sclera/choroid layers are  
381 responsible for the altered BMP signaling following inhibition of BACE enzyme activity.

382

383 **Expression of soluble, but not membrane-bound, Lrp2 LDLA1 domain from the RPE reduces**  
384 **choroidal/scleral Bmp activity**

385 In order to investigate whether cleavage of Lrp2 from membrane-bound to soluble form affected its  
386 ability to modulate Bmp signaling, we made plasmids *rpe65a:lrp2 LDLA1-eGFP* and *rpe65a:lrp2 LDLA1-*  
387 *ICD-eGFP* that drive expression of either soluble Lrp2 LDLA1 or membrane-bound Lrp2 LDLA1 with its  
388 native transmembrane domain, respectively. These plasmids were separately injected into BRE:dmKO2  
389 reporter zebrafish, and Bmp activity levels measured in the eye at 5 dpf by fluorescence quantification.  
390 In BRE reporter fish, fluorescence is almost completely confined to the choroid/scleral layers (see  
391 previous section). When compared with uninjected control *BRE:dmKO2* eyes, soluble Lrp2 LDLA1  
392 reduces Bmp activity significantly, while membrane-bound Lrp2 LDLA1 has did not affect reporter  
393 activity (Figure 8). This indicates that soluble LDLA1 can act as an inhibitor for Bmps, preventing them  
394 from binding and signaling through appropriate receptors, while membrane-bound LDLA1 does not  
395 interfere with Bmp signaling, but potentially augments other pathways within RPE cells..

396

397 ***lrp2*<sup>-/-</sup> zebrafish eyes have elevated transcription of ECM components and modulating genes**

398 Associations between refractive error and genes involved in ECM growth and remodeling have been  
399 reported in individual gene studies, and in genome-wide association studies (25,26,58–64). In the eye,  
400 BMPs have been shown to inhibit excessive TGF- $\beta$ 2 induction of ECM proteins (65–69). Since we have  
401 shown that absence of Lrp2 leads to modulation of genes influenced by Bmp overexpression, we  
402 hypothesized that Lrp2 may assist in fine-tuning Bmp levels to properly control deposition and turnover  
403 of ECM proteins. GSEA analysis of *lrp2*<sup>-/-</sup> and wild-type eyes at 1 mpf showed upregulation of ECM

404 components and modulators when queried using ECM-receptor interaction pathway signature (KEGG  
405 pathway hsa04512; gene names converted from human to zebrafish) (Figure 9). This suggests that Lrp2  
406 is necessary in the eye to maintain appropriate levels of ECM proteins in the eye, and that ECM protein  
407 dysregulation may result in the excessive eye growth seen in *lrp2/bugeye* mutants.

408

## 409 **Discussion**

410 Mutations in Lrp2 cause excessive eye growth and myopia; however, the nature of the influence of  
411 Lrp2 on ocular globe size and emmetropization is likely multifactorial and has not been fully elucidated.  
412 Here we show that transgenic expression of recombinant, full length Lrp2 from the zebrafish RPE can  
413 significantly reduce the *lrp2* mutant phenotype, demonstrating that the effects of Lrp2 are at least partly  
414 local to the eye, and not exclusively the result of systemic factors that circulate in the blood or lymphatic  
415 systems. This interpretation is consistent with recent studies of mice with *foxg1*-mediated inactivation  
416 of Lrp2, which eliminates expression from the neural retina, RPE, and forebrain and caused eye  
417 enlargement and myopia (70). Using transcriptomic analyses, we found deletion of Lrp2 altered Bmp  
418 signaling, as well as other pathways. Because of the specificity of perturbed Bmp signaling to the RPE  
419 and sclera/choroid, coupled with previous studies implicating BMP signaling in emmetropization, we  
420 focused subsequent experiments on how Lrp2 regulates this pathway. Our studies indicate that Lrp2 can  
421 be cleaved from the RPE to release an extracellular domain capable of binding and inhibiting Bmp4  
422 activity, and potentially activity mediated by other Bmps. Indeed, RPE expression of the Lrp2 LDLA1  
423 domain mimicked the effects of known BMP2/4/7 ligand trap antagonists to promote eye size and  
424 myopia. Application of sheddase inhibitors to zebrafish larvae suggests that the Lrp2 extracellular  
425 domain is released from the basal side of the RPE, adjacent to the sclera /choroid, and cleavage is  
426 mediated by BACE activity. The Lrp2 sheddase, therefore, acts as a molecular switch to convert the full-  
427 length Lrp2 protein from a potential facilitator of Bmp signaling and modulator of other pathways, to a

428 soluble antagonist of Bmp signaling. Cumulatively, this suggests that regulated cleavage of Lrp2 enables  
429 fine-tuning of multiple pathways to control ocular growth and emmetropization. We propose a model  
430 where wild-type eyes balance cleavage of Lrp2 from a membrane-bound to a soluble form thus fine-  
431 tuning Bmp signaling. When Lrp2 is completely absent, signaling pathways augmented by membrane-  
432 bound Lrp2, such as BMP, Shh, and perhaps others, can no longer be facilitated, leading to reduced  
433 activity and excessive eye growth (Figure 10). This disease phenotype can be further exacerbated by  
434 transgenic expression of soluble Lrp2 LDLA1 which acts as a decoy for Bmp ligands, decreasing signaling  
435 further and causing greater eye growth.

436

437 Complexity in Lrp2 function is underscored by its effect on multiple pathways, but also on its distinct  
438 actions in different tissues. For example, in addition to altered Bmp signaling, loss of Lrp2 in zebrafish  
439 also affects Shh signaling in the eye. Our observed changes in Shh signaling with zebrafish are consistent  
440 with recent analysis of the retinal margin in *Lrp2* mutant mice (9). This study showed elevated Shh  
441 activity and subsequent hyperplasia of the ciliary epithelium. Expansion of the ciliary epithelium is also  
442 observed in zebrafish (43). In both mice and zebrafish with *lrp2* mutations, neural retinal growth,  
443 however, is insufficient for the size of the eye enlargement and the neuronal layers become stretched  
444 and thin prior to detected degeneration of ganglion cells. These observations suggest that Shh  
445 contributes to buphthalmia by promoting proliferation of the ciliary epithelium, which consequently  
446 increases aqueous humor production, and that fluid pressure promotes expansion of the ocular globe.  
447 Distinct from Lrp2 function in the ciliary epithelium, our data indicates RPE-localized Lrp2 modulates  
448 signaling that ultimately controls extracellular remodeling associated with the sclera and choroid which  
449 is known to underlie axial length changes.

450 Potentially, tissue-specific functions of Lrp2 may depend on the presence of ligands and expression  
451 of other cell surface (co-)receptors, as well as sheddase activity. As previously demonstrated, cellular

452 and tissue context governs whether Lrp2 positively or negatively impacts Shh signaling (9,10,56). Lrp2 in  
453 the forebrain serves as a Patched co-receptor to augment Shh activity, while in the ciliary epithelium  
454 Lrp2 mediates Shh endocytosis and lysosomal shuttling to temper Shh activity. Similar complexity is  
455 emerging with the influence of Lrp2 on Bmp signaling. Previously, it has been demonstrated in forebrain  
456 ventricular cells that full-length Lrp2 can also endocytose and facilitate lysosomal degradation of Bmp4  
457 (56). Conversely, full-length Lrp2 on RPE cells may function to augment Bmp activity within those cells.  
458 In vascular endothelial cell precursors, the highly homologous Lrp1 can function as a co-receptor with  
459 Alk6/BmpRII for Bmp4 to promote holocomplex endocytosis to prolong and enhance Bmp signaling (71).  
460 This possibility is consistent with a requirement of Bmp activity implicated by myopia-associated  
461 variants that affect genes encoding ligands, receptors and regulators of Bmp signaling. Our studies  
462 indicate that cleavage of Lrp2 would disrupt full-length function(s) and convert the extracellular domain  
463 to a Bmp ligand trap antagonist. In this manner, then, the fraction of uncleaved Lrp2 on RPE cells could  
464 autonomously augment Bmp signaling, while shed extracellular protein would non-autonomously  
465 temper Bmp signaling in the sclera and choroid. Proteolytic processing would also affect Shh signaling  
466 by preventing the full-length functional influence of Lrp2 on that pathway.

467 Our discovery that the shed extracellular domain of Lrp2 is functional has several implications.  
468 First, modulation of the BACE(-like) sheddase might serve as a therapeutic target for pathological,  
469 progressive myopia. However, the BACE1 inhibitor LY2811376 has been shown to cause retinal  
470 dystrophy in rodents (72,73). Similarly, genetic deletion of BACE1 in mice resulted in significant  
471 choroidal, RPE, and retinal pathology (73). As BACE proteases are known to process many different  
472 proteins, any therapeutic approach to modulate Lrp2 cleavage would need precision. Related to  
473 cleavage of the Lrp2 extracellular domain, it is interesting to note that mouse models of Lrp2 knockout  
474 show different phenotypes depending on the mutant allele: homologous recombination to replace 1.5  
475 kb of the *Lrp2* gene with a neomycin cassette results in near-total embryonic lethality in homozygous

476 *Lrp2* mice due to holoprosencephaly, mimicking loss of Shh function. In contrast, a single point mutation  
477 causing a premature stop codon after amino acid 2721 allows for significantly greater survival and leads  
478 to eye enlargement and myopia (74–77). Prematurely terminating *Lrp2* before the transmembrane  
479 domain may produce exclusively the soluble extracellular domain, restricting *Lrp2* activity to a ligand  
480 trap function. Specifically engineered mutant alleles for *Lrp2* should help illuminate the multi-modal  
481 activities of *Lrp2*.

482       Importantly, we show that transcriptional upregulation of ECM components in the eye is one  
483 outcome of *Lrp2* inactivity, which directly suggests a mechanism for excessive eye growth and refractive  
484 error to occur. Overall, our work along with that of others supports the concept that *Lrp2* is a  
485 homeostatic node that buffers and integrates multiple pathways to precisely control initial eye growth  
486 and emmetropization. In its absence, subtle and sustained alterations in signaling impact eye size and  
487 refraction and cause severe myopia.

## 488 **Materials and Methods**

### 489 **Fish maintenance**

490 Zebrafish (*Danio rerio*) were maintained at 28.5°C on an Aquatic Habitats recirculating filtered water  
491 system (Aquatic Habitats, Apopka, FL) in reverse-osmosis purified water supplemented with Instant  
492 Ocean salts (60 mg/l) on a 14 h light: 10 h dark lighting cycle and fed a standard diet (78). All animal  
493 husbandry and experiments were approved and conducted in accordance with the guidelines set forth  
494 by the Institutional Animal Care and Use Committee of the Medical College of Wisconsin.

495

### 496 **Transgenesis**

497 DNA constructs for transgenesis were generated by PCR amplifying genes or domains of interest  
498 from adult eye cDNA (*nog3* CDS, *grem2* CDS, *bmp4* CDS, full-length and domains of *Irp2*) or gDNA  
499 (*rpe65a* promoter) before using the Invitrogen Gateway system (Thermo Fisher Scientific, Waltham, MA)  
500 to generate entry clones. The Gateway system was further used to assemble promoter: gene-tag  
501 constructs using backbone vectors containing Tol2-inverted repeats flanking the transgene constructs to  
502 facilitate transgenic insertion into the zebrafish genome (79,80). Plasmid and primer sequences are  
503 available on request.

504

### 505 **Spectral domain-optical coherence tomography (SD-OCT)**

506 Zebrafish eyes were imaged using a Bioptigen Envisu R2200 SD-OCT imaging system with a 12  
507 mm telecentric lens (Bioptigen, Morrisville, NC) essentially as described (46). To ensure uniform  
508 measuring of eyes, the iris edges were aligned in both dorsal-ventral and nasal-temporal planes before  
509 acquisition. Ocular dimensions were measured using the built-in manual caliper tool in the InVivoVue  
510 software platform with an applied refractive index constant of 1.30.

511

512 **RNA extraction and RNAseq**

513 *lrp2*<sup>-/-</sup> and wild-type zebrafish eyes were dissected at 1 mpf to give retinal, RPE and sclera/choroid  
514 samples. Each sample contained tissues from 10 – 20 eyes and was repeated in triplicate. RNA extracted  
515 from these samples was assayed for tissue specificity using retinal-, RPE- or sclera/choroid-specific  
516 marker genes by qPCR, before analyzing by RNAseq. RNA was processed for sequencing by BGI Americas  
517 (Cambridge, MA), using an Illumina HiSeq™ 2000 instrument, and Bowtie2 used to align to the current  
518 zebrafish genome (GRCz10 (GCA\_000002035.3)).

519

520 **Direct link to deposited data**

521 The datasets supporting this article are available in the NCBI Gene Expression Omnibus (GEO) archive.

522 Accession number for the data is GSE97125. Link to the data:

523 <https://www.ncbi.nlm.nih.gov/geo/query/acc.cgi?acc=GSE97125>.

524

525 **Gene set enrichment analysis (GSEA)**

526 RNAseq datasets were analyzed for enrichment of genes associated with transcript signatures  
527 defined by overexpression of zebrafish Bmp4 and Shha. Briefly, datasets and signature gene lists were  
528 entered into the stand-alone GSEA tool (48,49). Resulting sets of enriched genes were tabulated using  
529 standard output criteria (enrichment score (ES), normalized enrichment score (NES), nominal p-value,  
530 false discovery rate q-value, family-wise error rate).

531

532 **HEK293T cell culture and immunoprecipitation**

533 Zebrafish Lrp2 LDLA domains 1 through 4 were individually placed under the control of a CMV  
534 promoter and tagged at their C-terminus with a 15 amino acid S•tag epitope, which can be immobilized  
535 using S•protein conjugated to agarose beads. The native Lrp2 signal peptide was placed upstream of



536 each LDLA domain to facilitate proper protein export. Zebrafish Bmp4 sequence was placed downstream  
537 of a CMV promoter, and an internal eGFP tag was placed after the furin cleavage sites so that when  
538 translated mature Bmp4 could be detected after removal of the prodomain (81). Plasmids *CMV:eGFP-*  
539 *bmp4* and *CMV:lrp2 (signal peptide-LDLA<sub>x</sub>)-S\*tag* (where x represents one of the LDLA domains 1 – 4)  
540 were transfected into HEK293T cells for 24 hours. Proteins were extracted from pelleted cells using a  
541 gentle RIPA buffer, and incubated with S-protein agarose (EMD Millipore, Temecula, CA) before washing  
542 and eluting from agarose by boiling in reducing protein loading dye. Proteins were separated on Bio-Rad  
543 Any kD gradient SDS-PAGE gels before transferring to Immobilon-F PVDF membranes. Western blots  
544 were probed using anti-eGFP antibody JL-8 (Clontech, Mountain View, CA) and developed using the LI-  
545 COR Odyssey buffer and imaging system (LI-COR, Lincoln, NE).

546 Similarly, HEK293T cells were transfected with *pToI2-CMV:SP6-seGFP-lrp2 ECD-ICD-mCherry*  
547 plasmid DNA and cultured for 24 hours before adding inhibitors or activators of sheddases. These  
548 compounds were incubated with the cells for 24 hours before conditioned medium was collected.  
549 Conditioned medium was applied to GFP-Trap®\_A agarose (Chromotek, Hauppauge, NY) for 2 hours  
550 before washing the agarose and eluting bound protein by boiling in reducing protein loading dye.  
551 Western blotting was carried out as above. Where appropriate, Western blot bands were quantified  
552 using ImageJ (Rasband, W.S., ImageJ, U. S. National Institutes of Health, MD).

553

#### 554 **Zebrafish in vivo Bmp reporter assay**

555 BACE inhibitor compounds or DMSO as control were bath-applied to transgenic *BRE:d2GFP*  
556 zebrafish for 24 hours before imaging fluorescence in the eye using a Nikon Eclipse E600FN confocal  
557 fluorescent microscope (Nikon, Tokyo, Japan). Fluorescent intensity was measured in ImageJ by  
558 outlining the region of interest and measuring the integrated density for fluorescence, correcting for

559 background fluorescence (82). Double transgenic *BRE:d2GFP/ rpe65a:mCherry-CAAX* or *BRE:dmKO2*  
560 zebrafish were imaged at 5 dpf to identify the GFP-positive tissue in the larval eye.

561

## 562 **Statistical analyses**

563 Eye measurements were processed using Microsoft Excel (Microsoft, Redmond, WA) and  
564 graphed using GraphPad Prism (GraphPad, La Jolla, CA). Standard deviation (SD) and analysis of variance  
565 (ANOVA) with post-test analyses were calculated using GraphPad Prism. Sample sizes were not  
566 calculated in advance, but post hoc calculations showed that most experiments exceeded a statistical  
567 power of 95% for alpha = 0.05. Post hoc sample sizes were calculated for axial length, axial length: body  
568 axis, and axial length: lens diameter metrics, to detect an outcome of 10% change relative to wild-type  
569 at 2 mpf and 3 mpf. An exception was 3 mpf wild-type axial length: lens diameter, where a 20% size  
570 change could be detected with significance using the numbers of animals tested. *lrp2*<sup>-/-</sup> mutant eye  
571 metrics usually changed by more than 10% of the wild-type metric under consideration.

572

## 573 **Acknowledgements**

574 The authors thank Michael Cliff and William Hudzinski for zebrafish husbandry. We are also  
575 grateful to Amy Ludwig-Kubinkski, Jason Bader and Amira Pavlovich for assistance and advice on cell  
576 culture and Western blotting. Finally, we are indebted to Dr. Joe Besharse for critical feedback and  
577 suggestions. This work was supported by National Institutes of Health/National Eye Institute R01  
578 research grant EY016060 (BAL) as well as a Core Grant for Vision Research (P30 EY001931).

579

580

581

582        **Competing Interests**

583        The authors have no competing interests of any kind to disclose.

584

585

586

587 **References**

- 588 1. Storm T, Heegaard S, Christensen EI, Nielsen R. Megalin-deficiency causes high myopia, retinal  
589 pigment epithelium-macromelanosomes and abnormal development of the ciliary body in mice.  
590 *Cell Tissue Res.* 2014;358(1):99–107.
- 591 2. Assémat E, Châtelet F, Chandellier J, Commo F, Cases O, Verroust P, et al. Overlapping expression  
592 patterns of the multiligand endocytic receptors cubilin and megalin in the CNS, sensory organs and  
593 developing epithelia of the rodent embryo. *Gene Expr Patterns.* 2005 Dec;6(1):69–78.
- 594 3. Zheng G, Bachinsky DR, Stamenkovic I, Strickland DK, Brown D, Andres G, et al. Organ distribution  
595 in rats of two members of the low-density lipoprotein receptor gene family, gp330 and LRP/alpha  
596 2MR, and the receptor-associated protein (RAP). *J Histochem Cytochem Off J Histochem Soc.* 1994  
597 Apr;42(4):531–42.
- 598 4. Christensen EI, Raciti D, Reggiani L, Verroust PJ, Brändli AW. Gene expression analysis defines the  
599 proximal tubule as the compartment for endocytic receptor-mediated uptake in the *Xenopus*  
600 pronephric kidney. *Pflüg Arch Eur J Physiol.* 2008 Sep;456(6):1163–76.
- 601 5. Kerjaschki D, Noronha-Blob L, Sacktor B, Farquhar MG. Microdomains of distinctive glycoprotein  
602 composition in the kidney proximal tubule brush border. *J Cell Biol.* 1984 Apr;98(4):1505–13.
- 603 6. Kantarci S, Al-Gazali L, Hill RS, Donnai D, Black GCM, Bieth E, et al. Mutations in LRP2, which  
604 encodes the multiligand receptor megalin, cause Donnai-Barrow and facio-oculo-acoustico-renal  
605 syndromes. *Nat Genet.* 2007 Aug;39(8):957–9.
- 606 7. Donnai D, Barrow M. Diaphragmatic hernia, exomphalos, absent corpus callosum, hypertelorism,  
607 myopia, and sensorineural deafness: a newly recognized autosomal recessive disorder? *Am J Med*  
608 *Genet.* 1993 Oct 1;47(5):679–82.
- 609 8. Pober BR, Longoni M, Noonan KM. A review of Donnai-Barrow and facio-oculo-acoustico-renal  
610 (DB/FOAR) syndrome: clinical features and differential diagnosis. *Birt Defects Res A Clin Mol*  
611 *Teratol.* 2009 Jan;85(1):76–81.
- 612 9. Christ A, Christa A, Klippert J, Eule JC, Bachmann S, Wallace VA, et al. LRP2 Acts as SHH Clearance  
613 Receptor to Protect the Retinal Margin from Mitogenic Stimuli. *Dev Cell.* 2015 Oct 12;35(1):36–48.
- 614 10. Christ A, Christa A, Kur E, Lioubinski O, Bachmann S, Willnow TE, et al. LRP2 is an auxiliary SHH  
615 receptor required to condition the forebrain ventral midline for inductive signals. *Dev Cell.* 2012  
616 Feb 14;22(2):268–78.
- 617 11. Spoelgen R, Hammes A, Anzenberger U, Zechner D, Andersen OM, Jerchow B, et al. LRP2/megalin  
618 is required for patterning of the ventral telencephalon. *Development.* 2005;132(2):405–14.
- 619 12. Zou Z, Chung B, Nguyen T, Mentone S, Thomson B, Biemesderfer D. Linking Receptor-mediated  
620 Endocytosis and Cell Signaling: evidence for regulated intramembrane proteolysis of megalin in  
621 proximal tubule. *J Biol Chem.* 2004 Aug 13;279(33):34302–10.

- 622 13. Li Y, Cong R, Biemesderfer D. The COOH terminus of megalin regulates gene expression in  
623 opossum kidney proximal tubule cells. *Am J Physiol - Cell Physiol*. 2008 Aug 1;295(2):C529–37.
- 624 14. Christ A, Terryn S, Schmidt V, Christensen EI, Huska MR, Andrade-Navarro MA, et al. The soluble  
625 intracellular domain of megalin does not affect renal proximal tubular function in vivo. *Kidney Int*.  
626 2010 Sep;78(5):473–7.
- 627 15. Ishida T, Hatae T, Nishi N, Araki N. Soluble megalin is accumulated in the lumen of the rat  
628 endolymphatic sac. *Cell Struct Funct*. 2006;31(2):77–85.
- 629 16. Bachinsky DR, Zheng G, Niles JL, McLaughlin M, Abbate M, Andres G, et al. Detection of two forms  
630 of GP330. Their role in Heymann nephritis. *Am J Pathol*. 1993 Aug;143(2):598–611.
- 631 17. Orlando RA, Farquhar MG. Identification of a cell line that expresses a cell surface and a soluble  
632 form of the gp330/receptor-associated protein (RAP) Heymann nephritis antigenic complex. *Proc*  
633 *Natl Acad Sci U S A*. 1993 May 1;90(9):4082–6.
- 634 18. Jung FF, Bachinsky DR, Tang SS, Zheng G, Diamant D, Haveran L, et al. Immortalized rat proximal  
635 tubule cells produce membrane bound and soluble megalin. *Kidney Int*. 1998 Feb;53(2):358–66.
- 636 19. Norden AGW, Lapsley M, Igarashi T, Kelleher CL, Lee PJ, Matsuyama T, et al. Urinary megalin  
637 deficiency implicates abnormal tubular endocytic function in Fanconi syndrome. *J Am Soc Nephrol*  
638 *JASN*. 2002 Jan;13(1):125–33.
- 639 20. Pizzarello L, Abiose A, Ffytche T, Duerksen R, Thulasiraj R, Taylor H, et al. VISION 2020: The Right to  
640 Sight: a global initiative to eliminate avoidable blindness. *Arch Ophthalmol*. 2004 Apr;122(4):615–  
641 20.
- 642 21. Resnikoff S, Pascolini D, Mariotti SP, Pokharel GP. Global magnitude of visual impairment caused  
643 by uncorrected refractive errors in 2004. *Bull World Health Organ*. 2008 Jan;86(1):63–70.
- 644 22. Iwase A, Araie M, Tomidokoro A, Yamamoto T, Shimizu H, Kitazawa Y, et al. Prevalence and causes  
645 of low vision and blindness in a Japanese adult population: the Tajimi Study. *Ophthalmology*. 2006  
646 Aug;113(8):1354–62.
- 647 23. Wu L, Sun X, Zhou X, Weng C. Causes and 3-year-incidence of blindness in Jing-An District,  
648 Shanghai, China 2001-2009. *BMC Ophthalmol*. 2011;11:10.
- 649 24. Vitale S, Ellwein L, Cotch MF, Ferris FL, Sperduto R. Prevalence of refractive error in the United  
650 States, 1999–2004. *Arch Ophthalmol*. 2008 Aug;126(8):1111–9.
- 651 25. Kiefer AK, Tung JY, Do CB, Hinds DA, Mountain JL, Francke U, et al. Genome-wide analysis points to  
652 roles for extracellular matrix remodeling, the visual cycle, and neuronal development in myopia.  
653 *PLoS Genet*. 2013;9(2):e1003299.
- 654 26. Verhoeven VJM, Hysi PG, Wojciechowski R, Fan Q, Guggenheim JA, Höhn R, et al. Genome-wide  
655 meta-analyses of multi-ancestry cohorts identify multiple new susceptibility loci for refractive error  
656 and myopia. *Nat Genet*. 2013 May 29;45(6):712.

- 657 27. Jones LA, Sinnott LT, Mutti DO, Mitchell GL, Moeschberger ML, Zadnik K. Parental history of  
658 myopia, sports and outdoor activities, and future myopia. *Invest Ophthalmol Vis Sci*. 2007  
659 Aug;48(8):3524–32.
- 660 28. Rose KA, Morgan IG, Ip J, Kifley A, Huynh S, Smith W, et al. Outdoor activity reduces the prevalence  
661 of myopia in children. *Ophthalmology*. 2008 Aug;115(8):1279–85.
- 662 29. Wallman J, Winawer J. Homeostasis of eye growth and the question of myopia. *Neuron*. 2004 Aug  
663 19;43(4):447–68.
- 664 30. Bakrania P, Efthymiou M, Klein JC, Salt A, Bunyan DJ, Wyatt A, et al. Mutations in BMP4 cause eye,  
665 brain, and digit developmental anomalies: overlap between the BMP4 and hedgehog signaling  
666 pathways. *Am J Hum Genet*. 2008 Feb;82(2):304–19.
- 667 31. Reis LM, Tyler RC, Schilter KF, Abdul-Rahman O, Innis JW, Kozel BA, et al. BMP4 loss-of-function  
668 mutations in developmental eye disorders including SHORT syndrome. *Hum Genet*. 2011  
669 Oct;130(4):495–504.
- 670 32. McGlinn AM, Baldwin DA, Tobias JW, Budak MT, Khurana TS, Stone RA. Form-deprivation myopia  
671 in chick induces limited changes in retinal gene expression. *Invest Ophthalmol Vis Sci*. 2007  
672 Aug;48(8):3430–6.
- 673 33. Wang Q, Xue M-L, Zhao G-Q, Liu M-G, Ma Y-N, Ma Y. Form-deprivation myopia induces decreased  
674 expression of bone morphogenetic protein-2, 5 in guinea pig sclera. *Int J Ophthalmol*.  
675 2015;8(1):39–45.
- 676 34. Wang Q, Zhao G, Xing S, Zhang L, Yang X. Role of bone morphogenetic proteins in form-deprivation  
677 myopia sclera. *Mol Vis*. 2011;17:647–57.
- 678 35. Li H, Cui D, Zhao F, Huo L, Hu J, Zeng J. BMP-2 Is Involved in Scleral Remodeling in Myopia  
679 Development. *PLoS ONE* [Internet]. 2015 May 12 [cited 2015 Jun 2];10(5). Available from:  
680 <http://www.ncbi.nlm.nih.gov/pmc/articles/PMC4429026/>
- 681 36. Zhang Y, Liu Y, Wildsoet CF. Bidirectional, optical sign-dependent regulation of BMP2 gene  
682 expression in chick retinal pigment epithelium. *Invest Ophthalmol Vis Sci*. 2012;53(10):6072–80.
- 683 37. Zhang Y, Liu Y, Ho C, Wildsoet CF. Effects of imposed defocus of opposite sign on temporal gene  
684 expression patterns of BMP4 and BMP7 in chick RPE. *Exp Eye Res*. 2013 Apr;109:98–106.
- 685 38. Potti TA, Petty EM, Lesperance MM. A comprehensive review of reported heritable noggin-  
686 associated syndromes and proposed clinical utility of one broadly inclusive diagnostic term: NOG-  
687 related-symphalangism spectrum disorder (NOG-SSD). *Hum Mutat*. 2011 Aug 1;32(8):877–86.
- 688 39. Brown DJ, Kim TB, Petty EM, Downs CA, Martin DM, Strouse PJ, et al. Autosomal dominant stapes  
689 ankylosis with broad thumbs and toes, hyperopia, and skeletal anomalies is caused by  
690 heterozygous nonsense and frameshift mutations in NOG, the gene encoding noggin. *Am J Hum*  
691 *Genet*. 2002 Sep;71(3):618–24.

- 692 40. Milunsky J, Suntra C, MacDonald CB. Congenital stapes ankylosis, broad thumbs, and hyperopia:  
693 report of a family and refinement of a syndrome. *Am J Med Genet.* 1999 Feb 19;82(5):404–8.
- 694 41. Sieber C, Kopf J, Hiepen C, Knaus P. Recent advances in BMP receptor signaling. *Cytokine Growth*  
695 *Factor Rev.* 2009 Dec;20(5–6):343–55.
- 696 42. Brazil DP, Church RH, Surae S, Godson C, Martin F. BMP signalling: agony and antagonism in the  
697 family. *Trends Cell Biol.* 2015 May 1;25(5):249–64.
- 698 43. Veth KN, Willer JR, Collery RF, Gray MP, Willer GB, Wagner DS, et al. Mutations in zebrafish *Irp2*  
699 result in adult-onset ocular pathogenesis that models myopia and other risk factors for glaucoma.  
700 *PLoS Genet.* 2011 Feb;7(2):e1001310.
- 701 44. Sherpa T, Hunter SS, Frey RA, Robison BD, Stenkamp DL. Retinal proliferation response in the  
702 buphthalmic zebrafish, bugeye. *Exp Eye Res.* 2011 Oct;93(4):424–36.
- 703 45. Stujenske JM, Dowling JE, Emran F. The Bugeye Mutant Zebrafish Exhibits Visual Deficits that Arise  
704 with the Onset of an Enlarged Eye Phenotype. *Invest Ophthalmol Vis Sci.* 2011;52(7):4200–7.
- 705 46. Collery RF, Veth KN, Dubis AM, Carroll J, Link BA. Rapid, Accurate, and Non-Invasive Measurement  
706 of Zebrafish Axial Length and Other Eye Dimensions Using SD-OCT Allows Longitudinal Analysis of  
707 Myopia and Emmetropization. *PLoS One.* 2014;9(10):e110699.
- 708 47. Shen M-C, Ozacar AT, Osgood M, Boeras C, Pink J, Thomas J, et al. Heat-shock-mediated  
709 conditional regulation of hedgehog/gli signaling in zebrafish. *Dev Dyn Off Publ Am Assoc Anat.*  
710 2013 May;242(5):539–49.
- 711 48. Mootha VK, Lindgren CM, Eriksson K-F, Subramanian A, Sihag S, Lehar J, et al. PGC-1 $\alpha$ -responsive  
712 genes involved in oxidative phosphorylation are coordinately downregulated in human diabetes.  
713 *Nat Genet.* 2003 Jul;34(3):267–73.
- 714 49. Subramanian A, Tamayo P, Mootha VK, Mukherjee S, Ebert BL, Gillette MA, et al. Gene set  
715 enrichment analysis: a knowledge-based approach for interpreting genome-wide expression  
716 profiles. *Proc Natl Acad Sci U S A.* 2005 Oct 25;102(43):15545–50.
- 717 50. Boulanger A, Liu S, Henningsgaard AA, Yu S, Redmond TM. The Upstream Region of the *Rpe65*  
718 Gene Confers Retinal Pigment Epithelium-specific Expression in Vivo and in Vitro and Contains  
719 Critical Octamer and E-box Binding Sites. *J Biol Chem.* 2000 Oct 6;275(40):31274–82.
- 720 51. Kwan KM, Otsuna H, Kidokoro H, Carney KR, Saijoh Y, Chien C-B. A complex choreography of cell  
721 movements shapes the vertebrate eye. *Dev Camb Engl.* 2012 Jan;139(2):359–72.
- 722 52. Collery RF, Veth KN, Dubis AM, Carroll J, Link BA. Rapid, accurate, and non-invasive measurement  
723 of zebrafish axial length and other eye dimensions using SD-OCT allows longitudinal analysis of  
724 myopia and emmetropization. *PLoS ONE.* in press;
- 725 53. Chocron S, Verhoeven MC, Rentsch F, Hammerschmidt M, Bakkers J. Zebrafish *Bmp4* regulates  
726 left–right asymmetry at two distinct developmental time points. *Dev Biol.* 2007 May  
727 15;305(2):577–88.

- 728 54. Collery RF, Link BA. Dynamic smad-mediated BMP signaling revealed through transgenic zebrafish.  
729 Dev Dyn Off Publ Am Assoc Anat. 2011 Mar;240(3):712–22.
- 730 55. Higdon CW, Mitra RD, Johnson SL. Gene expression analysis of zebrafish melanocytes, iridophores,  
731 and retinal pigmented epithelium reveals indicators of biological function and developmental  
732 origin. PloS One. 2013;8(7):e67801.
- 733 56. Spoelgen R, Hammes A, Anzenberger U, Zechner D, Andersen OM, Jerchow B, et al. LRP2/megalin  
734 is required for patterning of the ventral telencephalon. Dev Camb Engl. 2005 Jan;132(2):405–14.
- 735 57. Collery RF, Link BA. Dynamic smad-mediated BMP signaling revealed through transgenic zebrafish.  
736 Dev Dyn. 2011;240(3):712–22.
- 737 58. Mutti DO, Cooper ME, O’Brien S, Jones LA, Marazita ML, Murray JC, et al. Candidate gene and locus  
738 analysis of myopia. Mol Vis. 2007 Jun 28;13:1012–9.
- 739 59. Metlapally R, Li Y-J, Tran-Viet K-N, Abbott D, Czaja GR, Malecaze F, et al. COL1A1 and COL2A1  
740 genes and myopia susceptibility: evidence of association and suggestive linkage to the COL2A1  
741 locus. Invest Ophthalmol Vis Sci. 2009 Sep;50(9):4080–6.
- 742 60. Lin H-J, Wan L, Tsai Y, Liu S-C, Chen W-C, Tsai S-W, et al. Sclera-related gene polymorphisms in high  
743 myopia. Mol Vis. 2009 Aug 20;15:1655–63.
- 744 61. Zha Y, Leung KH, Lo KK, Fung WY, Ng PW, Shi M, et al. TGFB1 as a susceptibility gene for high  
745 myopia: a replication study with new findings. Arch Ophthalmol Chic Ill 1960. 2009  
746 Apr;127(4):541–8.
- 747 62. Hall NF, Gale CR, Ye S, Martyn CN. Myopia and polymorphisms in genes for matrix  
748 metalloproteinases. Invest Ophthalmol Vis Sci. 2009 Jun;50(6):2632–6.
- 749 63. Wojciechowski R, Bailey-Wilson JE, Stambolian D. Association of matrix metalloproteinase gene  
750 polymorphisms with refractive error in Amish and Ashkenazi families. Invest Ophthalmol Vis Sci.  
751 2010 Oct;51(10):4989–95.
- 752 64. Chen ZT-Y, Wang I-J, Shih Y-F, Lin LL-K. The association of haplotype at the lumican gene with high  
753 myopia susceptibility in Taiwanese patients. Ophthalmology. 2009 Oct;116(10):1920–7.
- 754 65. Hernandez H, Millar JC, Curry SM, Clark AF, McDowell CM. BMP and Activin Membrane Bound  
755 Inhibitor Regulates the Extracellular Matrix in the Trabecular Meshwork. Invest Ophthalmol Vis Sci.  
756 2018 Apr 1;59(5):2154–66.
- 757 66. Wordinger RJ, Fleenor DL, Hellberg PE, Pang I-H, Tovar TO, Zode GS, et al. Effects of TGF-beta2,  
758 BMP-4, and gremlin in the trabecular meshwork: implications for glaucoma. Invest Ophthalmol Vis  
759 Sci. 2007 Mar;48(3):1191–200.
- 760 67. Wordinger RJ, Sharma T, Clark AF. The role of TGF-β2 and bone morphogenetic proteins in the  
761 trabecular meshwork and glaucoma. J Ocul Pharmacol Ther Off J Assoc Ocul Pharmacol Ther. 2014  
762 Apr;30(2–3):154–62.



- 763 68. Zode GS, Clark AF, Wordinger RJ. Bone morphogenetic protein 4 inhibits TGF-beta2 stimulation of  
764 extracellular matrix proteins in optic nerve head cells: role of gremlin in ECM modulation. *Glia*.  
765 2009 May;57(7):755–66.
- 766 69. Mody AA, Wordinger RJ, Clark AF. Role of ID Proteins in BMP4 Inhibition of Profibrotic Effects of  
767 TGF-β2 in Human TM Cells. *Invest Ophthalmol Vis Sci*. 2017 01;58(2):849–59.
- 768 70. Cases O, Joseph A, Obry A, Santin MD, Ben-Yacoub S, Pâques M, et al. Foxg1-Cre Mediated Lrp2  
769 Inactivation in the Developing Mouse Neural Retina, Ciliary and Retinal Pigment Epithelia Models  
770 Congenital High Myopia. *PLoS ONE* [Internet]. 2015 Jun 24 [cited 2016 Jun 13];10(6). Available  
771 from: <http://www.ncbi.nlm.nih.gov/pmc/articles/PMC4480972/>
- 772 71. Pi X, Schmitt CE, Xie L, Portbury AL, Wu Y, Lockyer P, et al. LRP1-dependent endocytic mechanism  
773 governs the signaling output of the bmp system in endothelial cells and in angiogenesis. *Circ Res*.  
774 2012 Aug 17;111(5):564–74.
- 775 72. Fielden MR, Werner J, Jamison JA, Coppi A, Hickman D, Dunn RT, et al. Retinal Toxicity Induced by  
776 a Novel β-secretase Inhibitor in the Sprague-Dawley Rat. *Toxicol Pathol*. 2014 Oct  
777 31;0192623314553804.
- 778 73. Cai J, Qi X, Kociok N, Skosyrski S, Emilio A, Ruan Q, et al. β-Secretase (BACE1) inhibition causes  
779 retinal pathology by vascular dysregulation and accumulation of age pigment. *EMBO Mol Med*.  
780 2012 Sep;4(9):980–91.
- 781 74. Willnow TE, Hilpert J, Armstrong SA, Rohlmann A, Hammer RE, Burns DK, et al. Defective forebrain  
782 development in mice lacking gp330/megalin. *Proc Natl Acad Sci*. 1996 Aug 6;93(16):8460–4.
- 783 75. Baardman ME, Zwier MV, Wisse LJ, Gittenberger-de Groot AC, Kerstjens-Frederikse WS, Hofstra  
784 RMW, et al. Common arterial trunk and ventricular non-compaction in Lrp2 knockout mice indicate  
785 a crucial role of LRP2 in cardiac development. *Dis Model Mech*. 2016 Apr 1;9(4):413–25.
- 786 76. Zarbalis K, May SR, Shen Y, Ekker M, Rubenstein JLR, Peterson AS. A focused and efficient genetic  
787 screening strategy in the mouse: identification of mutations that disrupt cortical development.  
788 *PLoS Biol*. 2004 Aug;2(8):E219.
- 789 77. Gajera CR, Emich H, Lioubinski O, Christ A, Beckervordersandforth-Bonk R, Yoshikawa K, et al. LRP2  
790 in ependymal cells regulates BMP signaling in the adult neurogenic niche. *J Cell Sci*. 2010 Jun  
791 1;123(11):1922–30.
- 792 78. Westerfield M. ZEBRAFISH BOOK, 5th Edition; A guide for the laboratory use of zebrafish (*Danio*  
793 *rerio*). Eugene, Oregon: University of Oregon Press; 2007.
- 794 79. Kawakami K, Shima A, Kawakami N. Identification of a functional transposase of the Tol2 element,  
795 an Ac-like element from the Japanese medaka fish, and its transposition in the zebrafish germ  
796 lineage. *Proc Natl Acad Sci U A*. 2000;97(21):11403–8.
- 797 80. Kwan KM, Fujimoto E, Grabher C, Mangum BD, Hardy ME, Campbell DS, et al. The Tol2kit: a  
798 multisite gateway-based construction kit for Tol2 transposon transgenesis constructs. *Dev Dyn*.  
799 2007;236(11):3088–99.

800 81. Entchev EV, Schwabedissen A, Gonzalez-Gaitan M. Gradient formation of the TGF-beta homolog  
801 Dpp. *Cell*. 2000 Dec 8;103(6):981–91.

802 82. Burgess A, Vigneron S, Brioude E, Labbé J-C, Lorca T, Castro A. Loss of human Greatwall results in  
803 G2 arrest and multiple mitotic defects due to deregulation of the cyclin B-Cdc2/PP2A balance. *Proc*  
804 *Natl Acad Sci U S A*. 2010 Jul 13;107(28):12564–9.

805

806

807 **Figure Legend**

808 **Figure 1. The zebrafish *rpe65a* promoter drives transgene expression in the developing and adult**

809 **RPE.** A - D. the *rpe65a* promoter drives expression in the 5 dpf RPE (A,B, cryosection; C, D, en face in  
810 vivo). E - H. Strong eGFP expression is seen in the 3 mpf adult retina but not the CMZ. I -L. RPE  
811 expression (green) driven by the *rpe65a* promoter contrasts with red-green cone-specific *zpr-1* antibody  
812 staining (magenta). M - P. Similarly, eGFP in RPE cells contrast with rod-specific *zpr-3* antibody staining  
813 (magenta). Scale bars: A, B, E - P = 50  $\mu$ m; C, D = 10  $\mu$ M. RPE, retinal pigment epithelium; PhR,  
814 photoreceptor; ONL, outer nuclear layer; INL, inner nuclear layer; GCL, ganglion cell layer; CMZ, ciliary  
815 marginal zone.

816

817 **Figure 2. *rpe65a*-driven *Lrp2* partially rescues the myopic *Lrp2/bugeye* phenotype in adult**

818 **zebrafish.** A. Eye axial length: lens diameter ratio is reduced in *Lrp2*<sup>-/-</sup> expressing RPE-derived *Lrp2* at 3  
819 mpf (0.09143 vs 0.1130; p=0.0001; Kruskal-Wallis test). However, *Lrp2*<sup>-/-</sup> *rpe65a>Lrp2-HA* eyes still have a  
820 significantly greater eye axial length: lens diameter ratio than wild-type controls (0.088 vs 0.1130;  
821 p<0.0001; Kruskal-Wallis test). B. Similarly, the relative refractive error is lessened in *Lrp2*<sup>-/-</sup> eyes  
822 expressing RPE-derived *Lrp2* at 3 mpf (-0.6013 vs -1.066; p<0.0001; Kruskal-Wallis test). This rescue is  
823 partial and does not restore myopic *Lrp2*<sup>-/-</sup> eyes to emmetropia (0.048 vs -1.066; p<0.0001; Kruskal-  
824 Wallis test). This experiment was performed twice for validation with similar results.

825

826 **Figure 3. *rpe65a*-driven *Noggin3* expression causes myopia in wild-type zebrafish and exacerbates**

827 **myopia in *Lrp2/bugeye* adults, while *rpe65a*-driven *Gremlin2* expression exacerbates myopia in *Lrp2*<sup>-/-</sup>**

828 **but not wild-type.** A. RPE-derived *Nog3* causes an increase in axial length: lens diameter ratio in both

829 *Lrp2*<sup>-/-</sup> and wild-type zebrafish at 2 mpf (*Lrp2*<sup>-/-</sup>: 2.14 vs 1.82; p=0.0037; Mann-Whitney test. *Lrp2*<sup>+/-</sup>: 1.76

830 vs 1.66; p=0.0019; Mann-Whitney test. n= 5 for *Lrp2*<sup>+/-</sup> *rpe65a>nog*; n= 7 for *Lrp2*<sup>-/-</sup> *rpe65a>nog*; n = 12

831 for *lrp2<sup>+/-</sup> rpe65a:Gal4*; n = 16 for *lrp2<sup>-/-</sup> rpe65a:Gal4*). B. RPE-derived Nog3 expression worsens the  
832 degree of relative refractive error in both *lrp2<sup>-/-</sup>* and wild-type zebrafish at 2 mpf (*lrp2<sup>-/-</sup>*: 0.262 vs 0.049;  
833 p=0.0299; Mann-Whitney test. *lrp2<sup>+/-</sup>*: -0.029 vs 0.044; p=0.0019; Mann-Whitney test.). C. RPE-derived  
834 Grem2 causes an increase in axial length: lens diameter ratio in *lrp2<sup>-/-</sup>* zebrafish at 2 mpf, but not in wild-  
835 type (*lrp2<sup>-/-</sup>*: 1.87 vs 1.78; p=0.0054; Mann-Whitney test. n was greater than 24 for each genotype,  
836 except for *lrp2<sup>-/-</sup> rpe65a:Gal4*, where n = 16.). D. RPE-derived Grem2 expression worsens the degree of  
837 relative refractive error in *lrp2<sup>-/-</sup>* zebrafish at 2 mpf, but not wild-type (*lrp2<sup>-/-</sup>*: -0.143 vs -0.076; p=0.0051;  
838 Mann-Whitney test.).

839

840 **Figure 4. The first LDLA domain of Lrp2 binds Bmp4 *in vivo*.** A. Schematic showing the structure of  
841 Lrp2 with four LDLA domains that bind cognate ligands. B – E. Expression of individual LDLA domains 1 –  
842 4 with eGFP-Bmp4 shows that immobilized LDLA1-S•tag can bind Bmp4, but that the other LDLA  
843 domains cannot.

844

845 **Figure 5. *rpe65a*-driven soluble Lrp2 (LDLA1) exacerbates myopia in *lrp2/bugeye* adults.** A. RPE-  
846 derived Lrp2 (LDLA1) causes an increase in axial length: lens diameter ratio in *lrp2<sup>-/-</sup>* zebrafish at 2 mpf,  
847 but not in wild-type (*lrp2<sup>-/-</sup>*: 1.98 vs 1.78; p<0.0001; Mann-Whitney test. n = greater than 20 for each  
848 genotype.). B. RPE-derived Lrp2 (LDLA1) expression worsens the degree of relative refractive error in  
849 *lrp2<sup>-/-</sup>* zebrafish at 2 mpf, but not wild-type(*lrp2<sup>-/-</sup>*: -0.197 vs -0.063; p<0.0001; Mann-Whitney test.).

850

851 **Figure 6. Lrp2 is cleaved extracellularly by a BACE family member to release a soluble form.** A.  
852 Schematic showing tagging of a 432 amino acid region of Lrp2 with secreted eGFP at the N-terminus and  
853 mCherry at the C-terminus to monitor extracellular cleavage, referred to as seGFP-Lrp2 (ECD/ICD)-  
854 mCherry. B - D. HEK293T cells transfected with seGFP-Lrp2 (ECD/ICD)-mCherry were treated 24 hours

855 after transfection with compounds and grown for another 24 hours before harvesting conditioned  
856 medium. eGFP-tagged domains cleaved from seGFP-Lrp2 (ECD/ICD)-mCherry were immobilized using  
857 Chromotek GFP-binding agarose before Western blotting and detection with JL-8 (anti-GFP antibody). E.  
858 When soluble eGFP-species levels from post-drug treatments were normalized to pre-treatment levels  
859 from the same culture plates, LY2811376-treatment appeared to reduce extracellular cleavage of seGFP-  
860 Lrp2 (ECD/ICD)-mCherry. Pixel intensity is expressed in arbitrary units based on ImageJ measurements of  
861 Western blot band densities.

862

863 **Figure 7. Inhibition of BACE enzyme activity in zebrafish increases Bmp signaling in the**  
864 **choroid/sclera of the eye.** Incubation of 4-5 dpf *BRE:d2GFP* larvae with LY2811376 or BACE inhibitor II  
865 caused increased levels of Bmp signaling in the choroid/sclera of the eye compared to DMSO-treated  
866 control siblings. n = 10 for LY2811376 treatment; n = 9 for BACE inhibitor II treatment; n = 9 for DMSO  
867 control treatment.

868

869 **Figure 8. Expression of soluble, but not membrane-bound, Lrp2 LDLA1 from RPE downregulates**  
870 **Bmp signaling in the choroid/sclera.** A, B *rpe65a:Lrp2 LDLA1-eGFP* or *rpe65a:Lrp2 LDLA1-ICD-eGFP*  
871 plasmids were injected into *BRE:dmKO2* reporter zebrafish and eye fluorescence measured at 4 dpf. C.  
872 Sclera/choroidal expression levels were unchanged from uninjected controls with Lrp2 LDLA1-ICD-eGFP  
873 (uninjected, 301 arbitrary units  $\pm$  173; Lrp2 LDLA1-ICD-eGFP, 320 arbitrary units  $\pm$  109), while Lrp2  
874 LDLA1-eGFP expression led to significant reduction of Bmp activity (153 arbitrary units  $\pm$  73).  
875 Fluorescence levels were compared using one-way ANOVA with Tukey's post-hoc test.

876

877 **Figure 9. Expression of ECM components is upregulated in *lrp2*<sup>-/-</sup> eyes.** GSEA analysis using an ECM-  
878 receptor KEGG pathway converted to zebrafish orthologs to query 1 mpf eyes show enrichment of ECM

879 gene expression with a normalized enrichment score = 1.897 for *lrp2*<sup>-/-</sup> eyes (nominal p value = 0.002,  
880 FDR q = 0.002, FWER p = 0.001).

881

882

883 **Figure 10. Model – Modulation of Lrp2-mediated Bmp4 signaling by extracellular cleavage allows**  
884 **fine-tuning of ligand levels between the RPE and sclera/choroid.** Lrp2 may facilitate Bmp4 signaling  
885 while the extracellular region of Lrp2 is tethered by its transmembrane domain. Extracellular cleavage of  
886 Lrp2 by member of the BACE protein family converts the soluble domain to a decoy receptor that no  
887 longer facilitates signaling. Absence of membrane-bound Lrp2 leads to reduced Bmp signaling which is  
888 associated with excessive eye growth. When *lrp2*<sup>-/-</sup> eyes with already reduced Bmp signaling express  
889 transgenic Lrp2 LDLA1 from the RPE, some Bmp ligands are bound by this decoy, further reducing Bmp  
890 signaling and increasing excessive eye growth even more.

891

892 **Table 1. Gene set enrichment analysis of wild-type and *lrp2*<sup>-/-</sup> zebrafish eyes and dissected tissues**  
893 **using Bmp4 and Shha pathway signature sets from this work.** GSEA analyses were conducted on  
894 RNAseq datasets from whole eye and dissected eye tissues using custom BMP4 and Shha-specific  
895 signatures. p-values lower than 0.05 were scored as +1, while p-values greater than 0.05 were scored as  
896 0. The final scores were summed and used to rank significance of each signaling pathway in each tissue.

897

898 **S1 Figure. qPCR with tissue-specific markers shows high levels of purity for dissected**  
899 **sclera/choroid, RPE and retina.** Dissected sclera, RPE and retina were assayed for expression of genes  
900 enriched in those tissues (*col1a1a*, *col12a1a*, sclera/choroid; *rpe65a*, *rlbp1b*, RPE; *gnat2*, *pde6c*, retina).  
901 Enrichment levels for each tissue are shown as normalized  $\Delta\Delta Cq$  (A), or as percentages (B).

902

903 **S1 Table. RNAseq datasets comparing wild-type and *lrp2*<sup>-/-</sup> zebrafish whole eyes, choroid/sclera,**  
904 **RPE and retina at 1 mpf, filtered for p<0.01, 50 RNAseq reads, and representation in all three sample**  
905 **replicates.**

906

907 **S2 Table. FPKM (Fragments Per Kilobase Million) gene transcript levels for 1 mpf wild-type and**  
908 ***lrp2*<sup>-/-</sup> zebrafish eyes and dissected eye tissues.**

909

910 **S3 Table. RNAseq datasets comparing wild-type and *lrp2*<sup>-/-</sup> zebrafish whole eyes, choroid/sclera,**  
911 **RPE and retina at 1 mpf, filtered for p<0.01, 50 fragments per kilobase of transcript per million**  
912 **mapped reads, and representation in all three sample replicates analyzed with Bmp4 and Shha**  
913 **signature pathway genes from this work.**

914

915 **S2 Figure. Bmp4 gene signatures used in this study.** A, B. Genes up- or down-regulated in 5 dpf eyes  
916 from *hsp70l:eGFP-bmp4* transgenic larvae compared with non-transgenic sibling controls were filtered  
917 for representation in three independent samples, and used to define zebrafish Bmp4-UP and Bmp4-  
918 DOWN gene signatures. C, D. Gene lists of the signature genes identified in A and B.

919

920 **S3 Figure. Shha gene signatures used in this study.** A, B. Genes up- or down-regulated in 5 dpf eyes  
921 from *hsp70l:shha-eGFP* transgenic larvae compared with non-transgenic sibling controls were filtered  
922 for representation in two independent samples, and used to define zebrafish Shha-UP and Shha-DOWN  
923 gene signatures. C, D. Gene lists of the signature genes identified in A and B.

924

925 **S4 Figure. Internal tagging of Bmp4 with eGFP allows *in vivo* tracking of the morphogen without loss**  
926 **of activity.** A. Schematic of Bmp4 showing insertion of eGFP downstream of furin cleavage sites tagging

927 the mature ligand. B. Multiple cleavage forms of eGFP-Bmp4 can be seen on Western blots of larval  
928 zebrafish extracts expressing eGFP-Bmp4 under the control of a heat-shock inducible promoter. The  
929 bands likely correspond to full-length propeptide eGFP-Bmp4, mature cleaved eGFP-Bmp4, and  
930 intermediates. C - F. eGFP-Bmp4 is secreted from cells in the developing embryos following expression.  
931 G, H. Overexpression of eGFP-Bmp in the developing embryos causes a ventralized phenotype. I -T.  
932 Overexpression of eGFP-Bmp4 in BRE-dmKO2 show perdurance of secreted Bmp4 24 hours after  
933 transgenic expression.

934

935 **S5 Figure. *rpe65a*-driven eGFP-Bmp4 causes larval coloboma and severe eye disorganization in**  
936 **adult zebrafish.** A, E. *rpe65a*-derived eGFP-Bmp4 causes larval phenotypes including coloboma. The  
937 failure of the optic fissure to close properly is often accompanied by prognathia of the mandible. Most  
938 larvae die, but some survive to adulthood, and show severe eye disorganization. F – L. Coloboma is seen  
939 where the optic fissure remains open with the lens protruding. Staining with anti-cone arrestin 3  
940 antibody, *zpr-1*, shows normally laminated cones in wild-type adults, but disorganization in plasmid-  
941 injected adults, where photoreceptor rosetting is seen.

942

943 **S6 Figure. RNAseq shows enriched expression of Bmp ligands in the RPE and choroid/sclera.** Bmp  
944 ligand family members, Bmp receptor family members and activin family members were assayed for  
945 expression levels in whole eyes and dissected eye tissues.

946

947 **S7 Figure. Zebrafish Lrp2 contains putative consensus substrate sites for BACE enzyme cleavage.**  
948 CLUSTAL alignments between zebrafish Lrp2 and published substrate sites of BACE show some  
949 homology. Locations of putative cleavage sites are indicated on a schematic representation of Lrp2.

950



| Tissue                            | Pathway                 | Bmp4        | Bmp4        | Shha      | Shha        | Nominal score |      |
|-----------------------------------|-------------------------|-------------|-------------|-----------|-------------|---------------|------|
| Whole eye                         | Direction of regulation | Up          | Down        | Up        | Down        | Bmp4          | Shha |
| Upregulated in class              |                         | <i>lrp2</i> | wild-type   | wild-type | <i>lrp2</i> |               |      |
| Enrichment Score (ES)             |                         | 0.272       | -0.343      | -0.469    | 0.353       |               |      |
| Normalized Enrichment Score (NES) |                         | 1.183       | -1.410      | -1.887    | 1.415       |               |      |
| Nominal p-value                   |                         | 0.114       | 0.024       | 0.000     | 0.020       |               |      |
| FDR q-value                       |                         | 0.114       | 0.024       | 0.000     | 0.020       |               |      |
| FWER p-Value                      |                         | 0.087       | 0.008       | 0.000     | 0.014       |               |      |
| Score                             |                         | 0           | +1          | +1        | +1          | +1            | +2   |
| Tissue                            | Pathway                 | Bmp4        | Bmp4        | Shha      | Shha        |               |      |
| Sclera/choroid                    | Direction of regulation | Up          | Down        | Up        | Down        |               |      |
| Upregulated in class              |                         | <i>lrp2</i> | <i>lrp2</i> | wild-type | <i>lrp2</i> |               |      |
| Enrichment Score (ES)             |                         | 0.263       | 0.457       | -0.383    | 0.381       |               |      |
| Normalized Enrichment Score (NES) |                         | 1.121       | 1.712       | -1.680    | 1.489       |               |      |
| Nominal p-value                   |                         | 0.221       | 0.002       | 0.010     | 0.011       |               |      |
| FDR q-value                       |                         | 0.221       | 0.002       | 0.010     | 0.011       |               |      |
| FWER p-Value                      |                         | 0.205       | 0.002       | 0.002     | 0.009       |               |      |
| Score                             |                         | 0           | +1          | +1        | +1          | +1            | +2   |
| Tissue                            | Pathway                 | Bmp4        | Bmp4        | Shha      | Shha        |               |      |
| RPE                               | Direction of regulation | Up          | Down        | Up        | Down        |               |      |
| Upregulated in class              |                         | <i>lrp2</i> | wild-type   | wild-type | <i>lrp2</i> |               |      |
| Enrichment Score (ES)             |                         | 0.353       | -0.327      | -0.507    | 0.337       |               |      |
| Normalized Enrichment Score (NES) |                         | 1.598       | -1.408      | -2.130    | 1.387       |               |      |
| Nominal p-value                   |                         | 0.001       | 0.017       | 0.000     | 0.032       |               |      |
| FDR q-value                       |                         | 0.001       | 0.017       | 0.000     | 0.032       |               |      |
| FWER p-Value                      |                         | 0.001       | 0.005       | 0.000     | 0.024       |               |      |
| Score                             |                         | +1          | +1          | +1        | +1          | +2            | +2   |
| Tissue                            | Pathway                 | Bmp4        | Bmp4        | Shha      | Shha        |               |      |
| retina                            | Direction of regulation | Up          | Down        | Up        | Down        |               |      |
| Upregulated in class              |                         | wild-type   | wild-type   | wild-type | <i>lrp2</i> |               |      |
| Enrichment Score (ES)             |                         | -0.256      | -0.241      | -0.419    | 0.338       |               |      |
| Normalized Enrichment Score (NES) |                         | -1.181      | -0.969      | -1.607    | 1.425       |               |      |
| Nominal p-value                   |                         | 0.074       | 0.499       | 0.012     | 0.017       |               |      |
| FDR q-value                       |                         | 0.074       | 0.499       | 0.012     | 0.017       |               |      |
| FWER p-Value                      |                         | 0.041       | 0.270       | 0.006     | 0.008       |               |      |
| Score                             |                         | +1          | 0           | +1        | +1          | +1            | +2   |

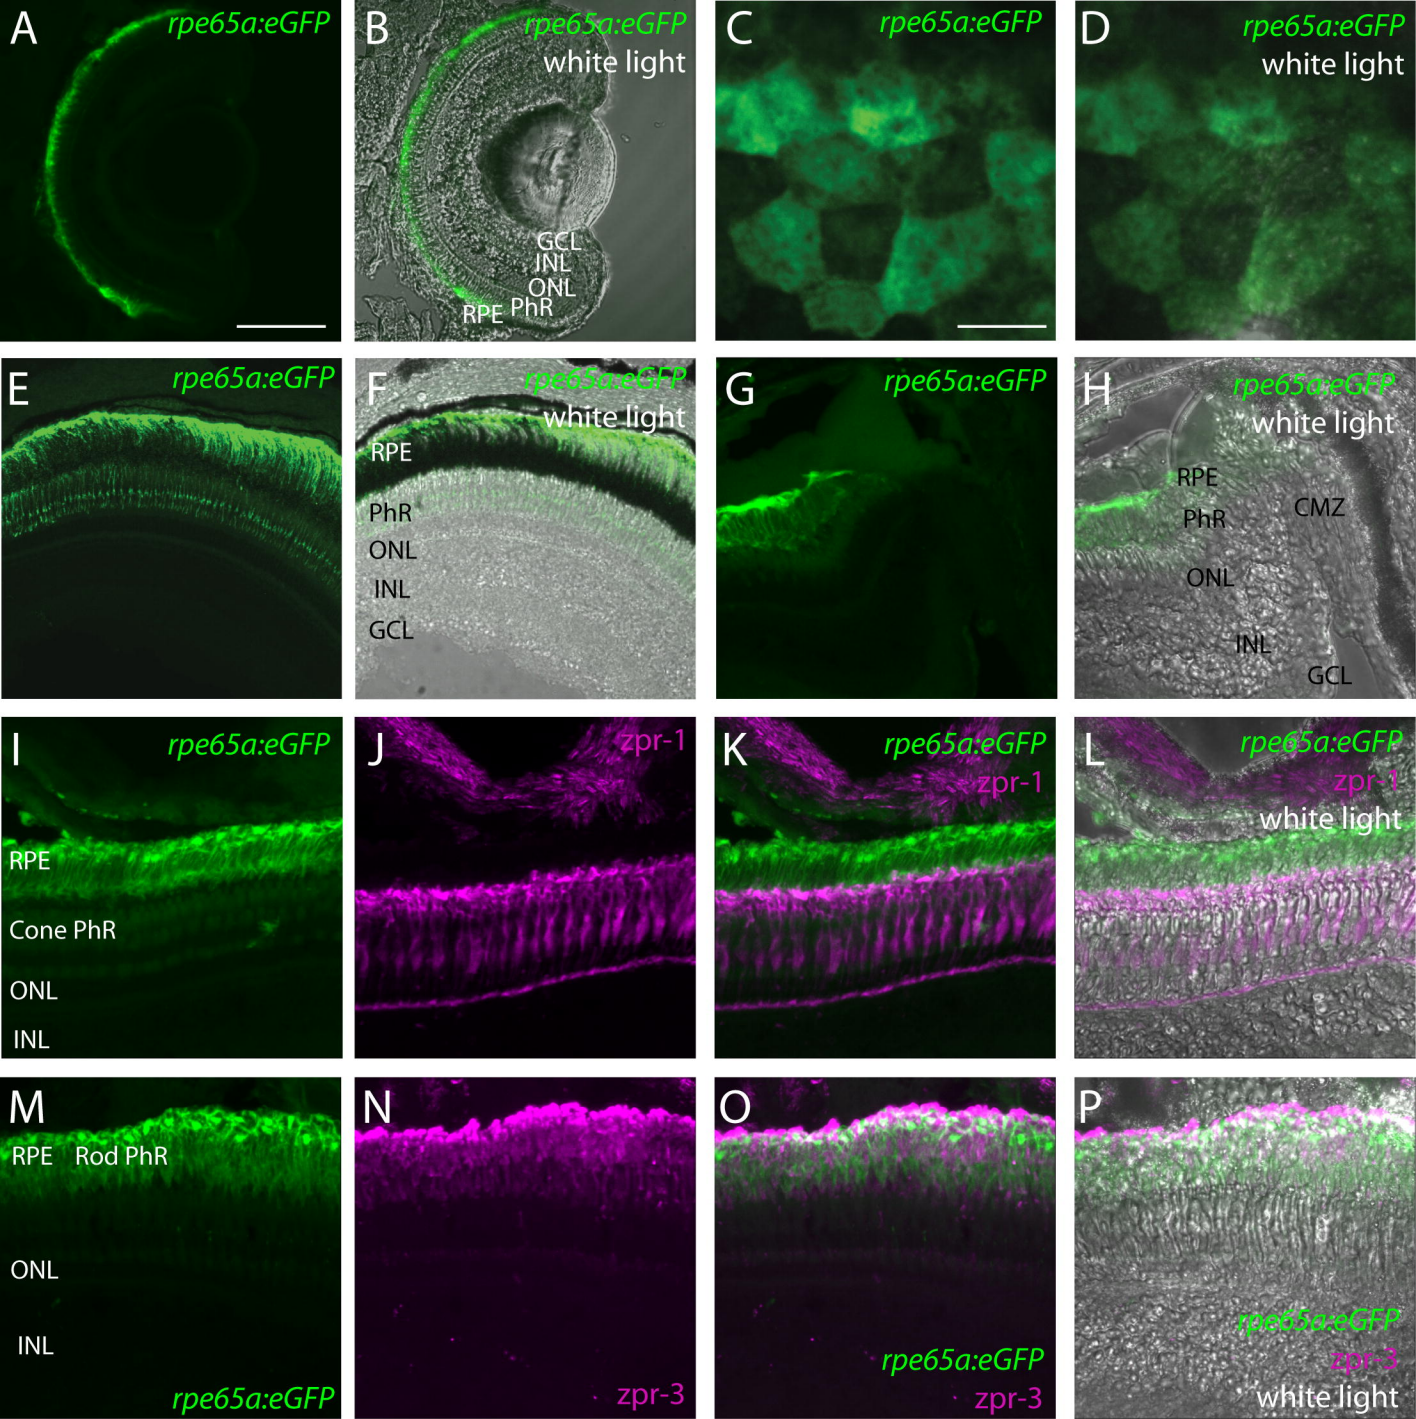

**A****Eye axial length: body axis**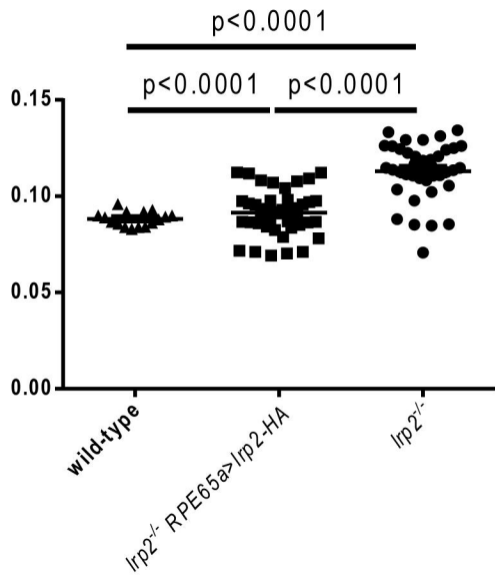**B****Relative refractive error**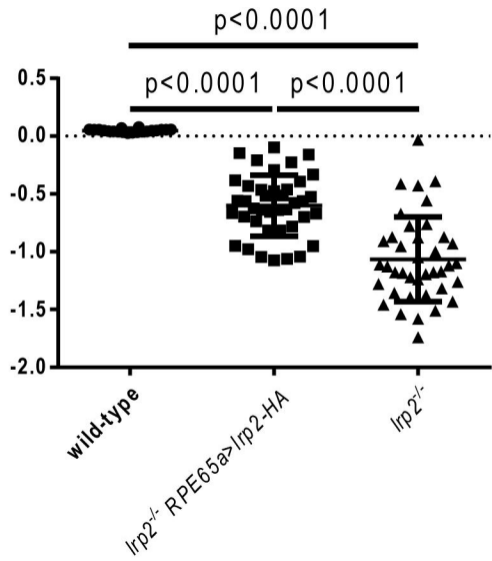

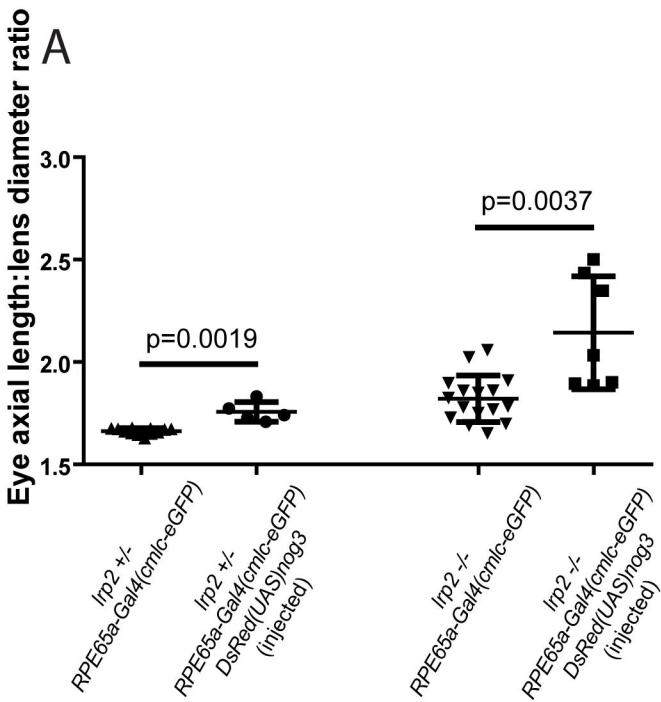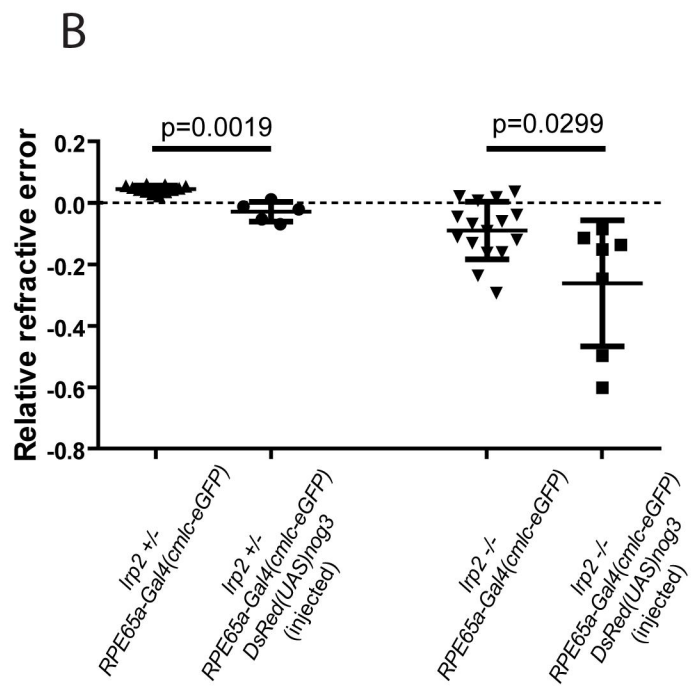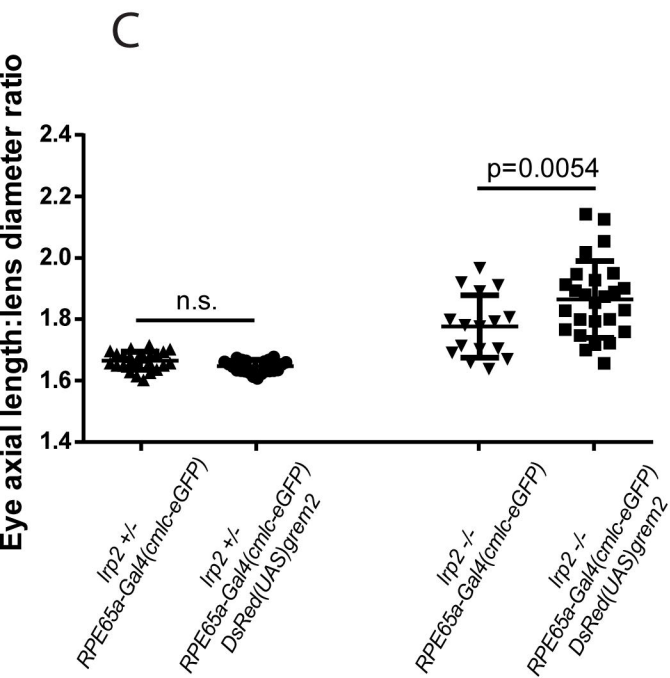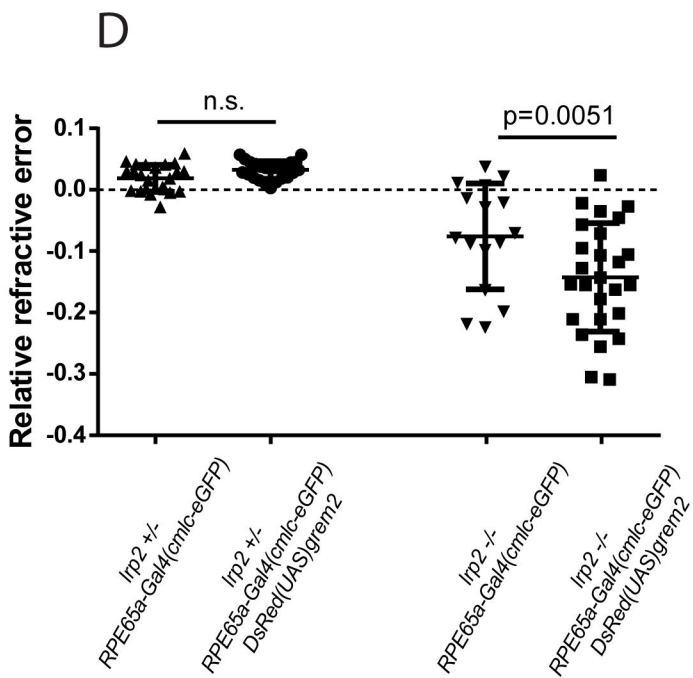

**A**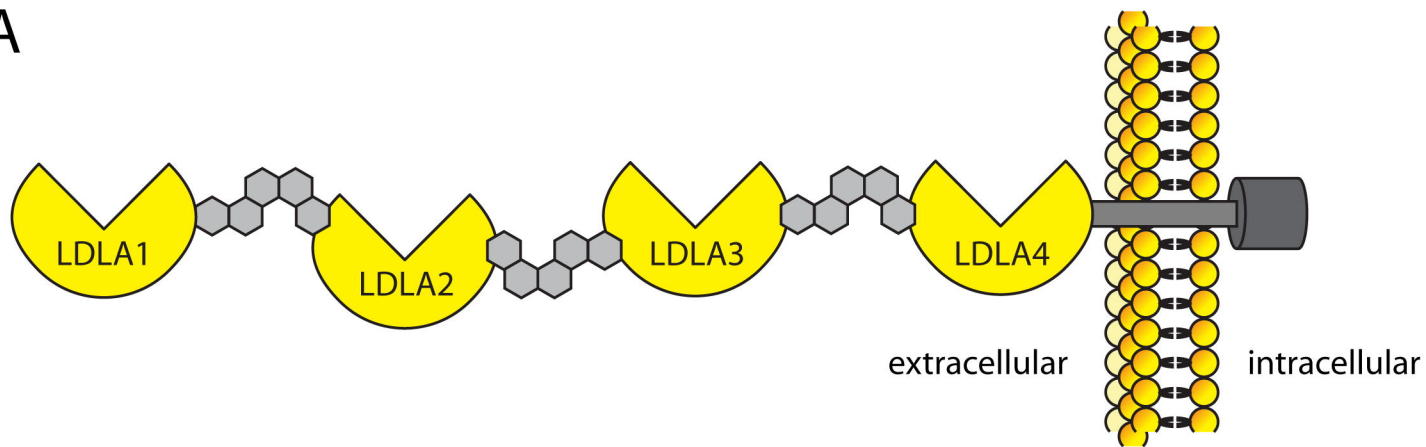**B**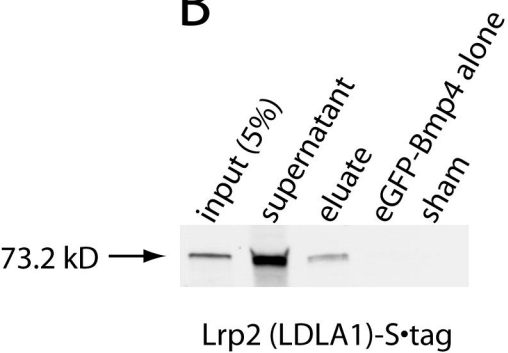**C**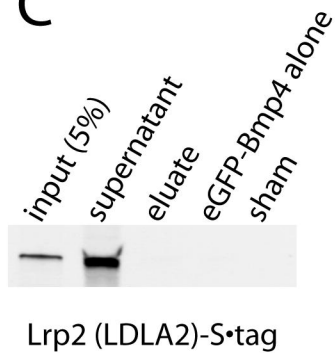**D**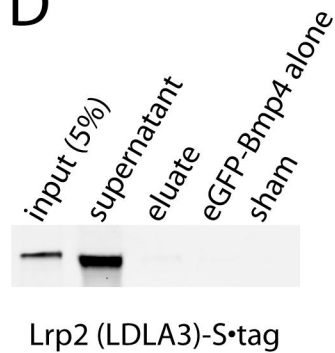**E**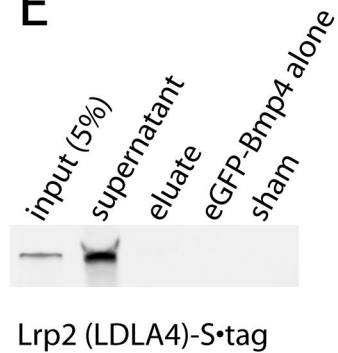

A

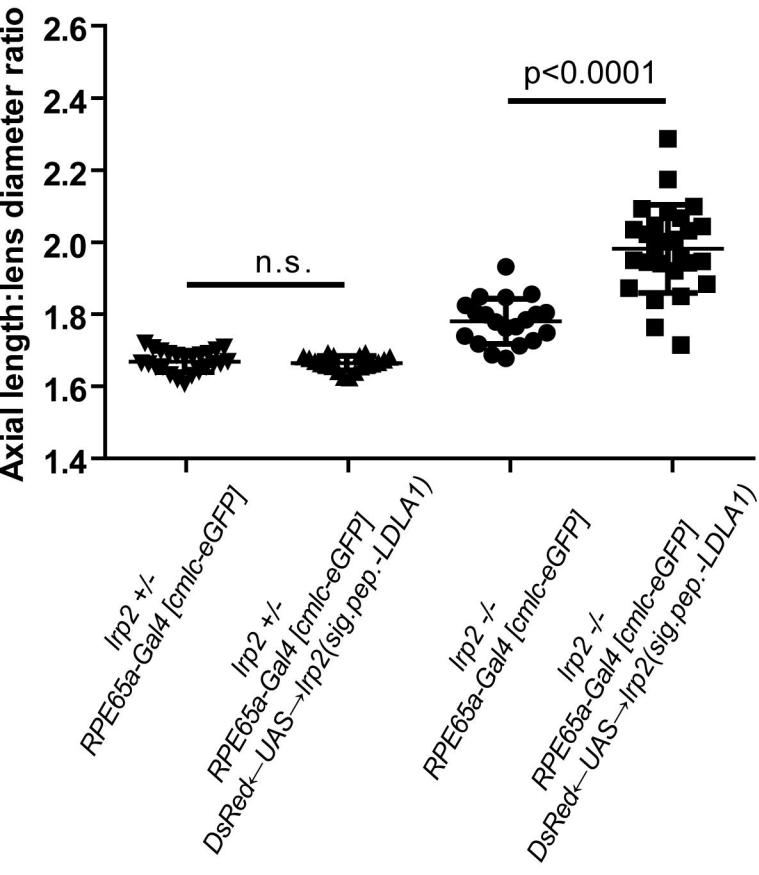

B

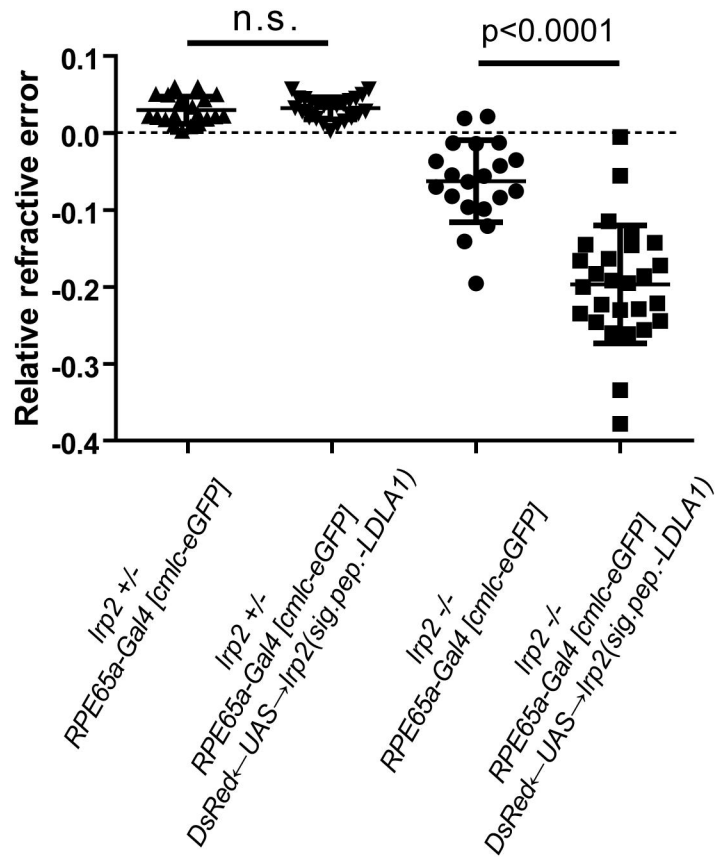

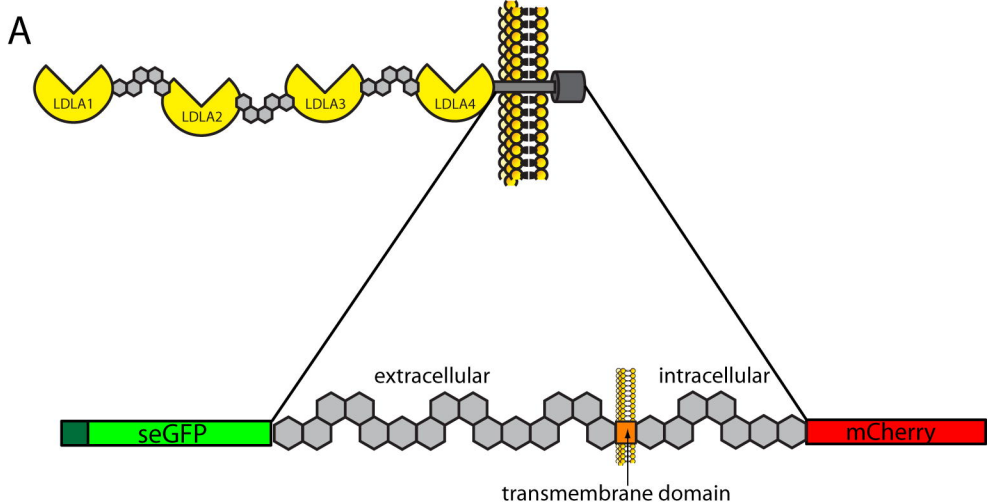

**B** Chromotek GFP-binding bead pulldown of eGFP-tagged Lrp2 cleaved domains

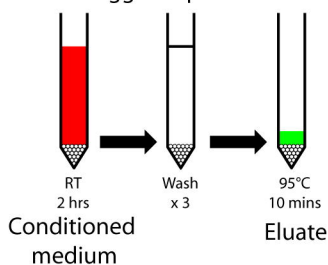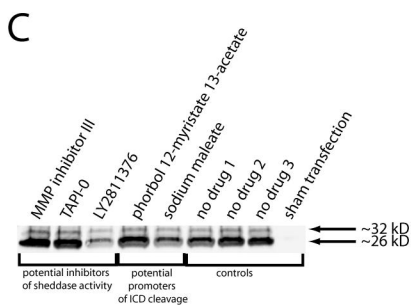

**D**

Predrug culture medium

LY2811376  
(BACE inhibitor; 10  $\mu$ m)

Postdrug culture medium

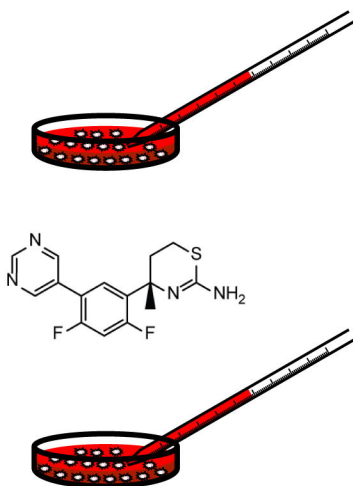

**E** Normalized to 24h predrug medium

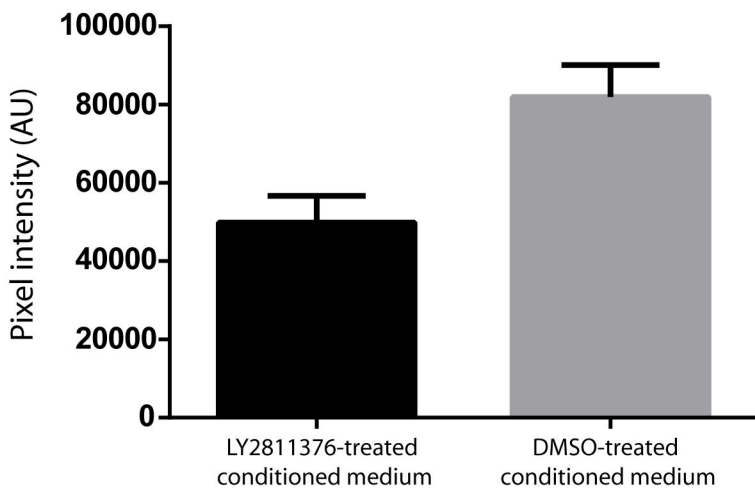

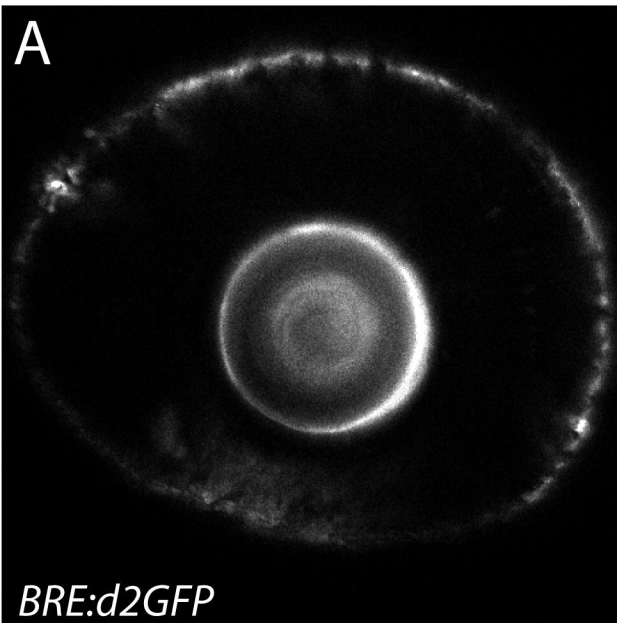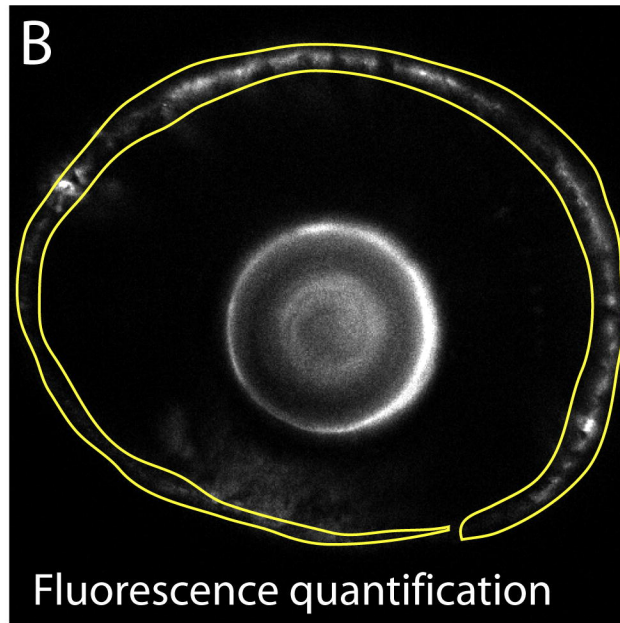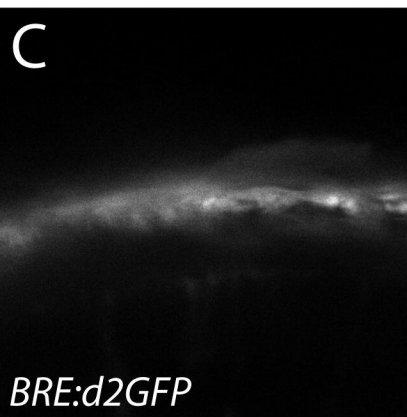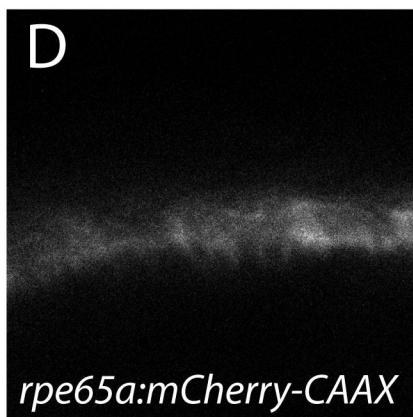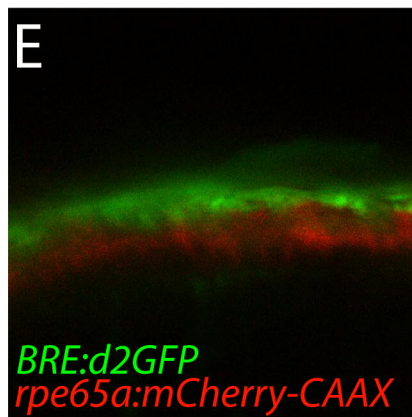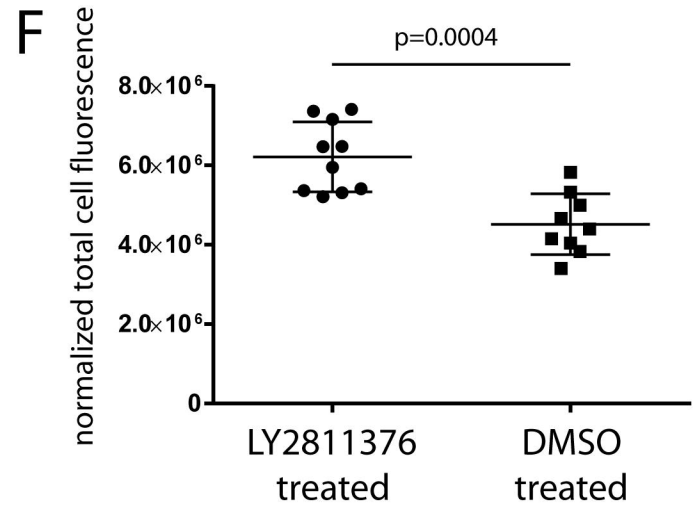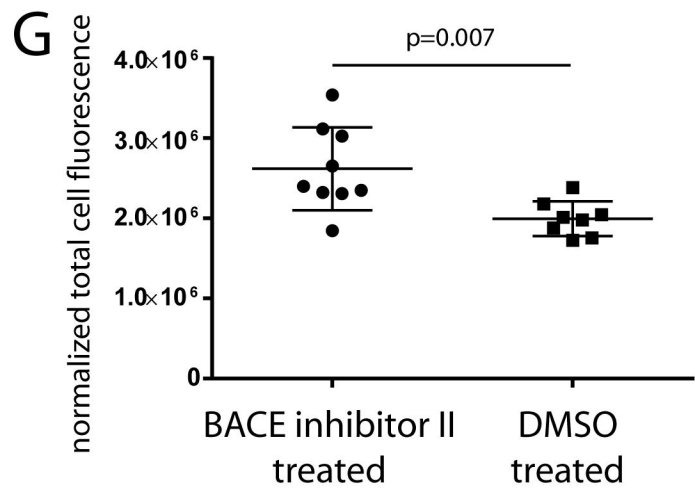



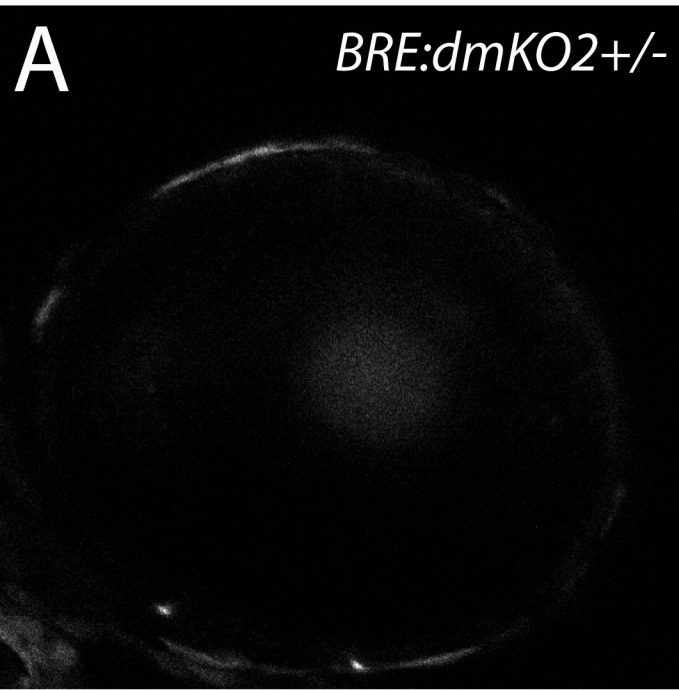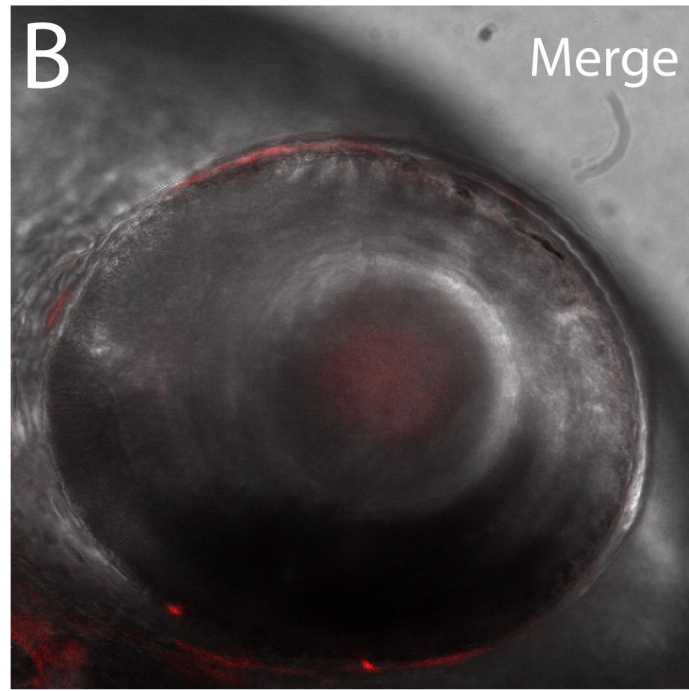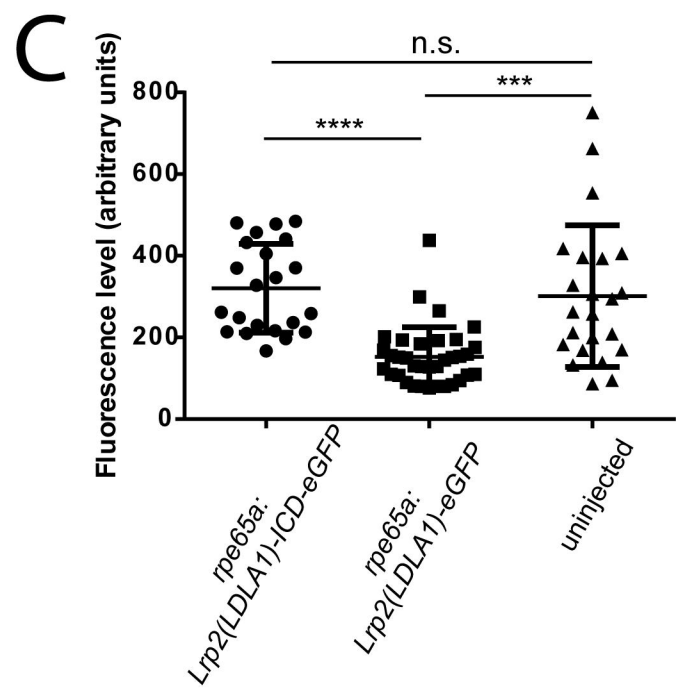

# Enrichment plot: ECM-RECEPTOR INTERACTIONS (KEGG HSA04512)

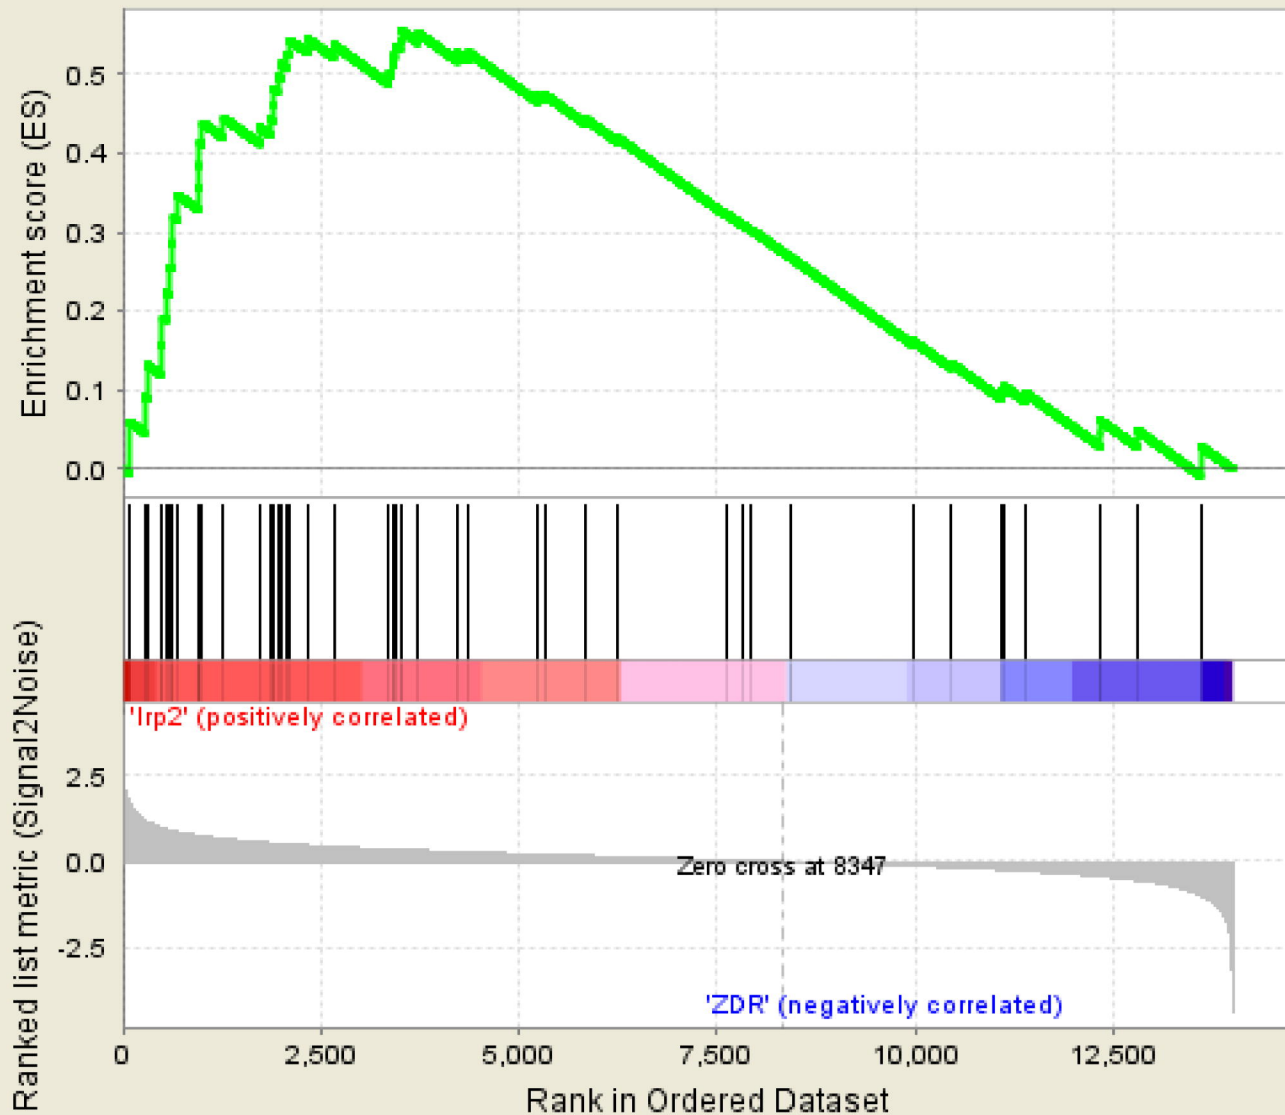

— Enrichment profile — Hits — Ranking metric scores

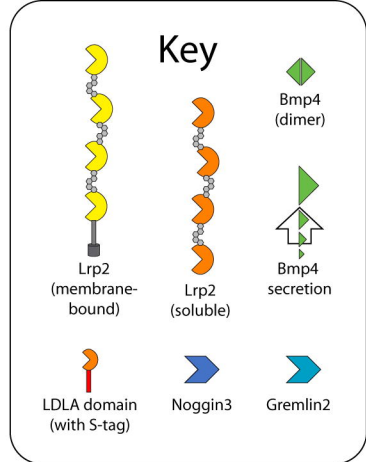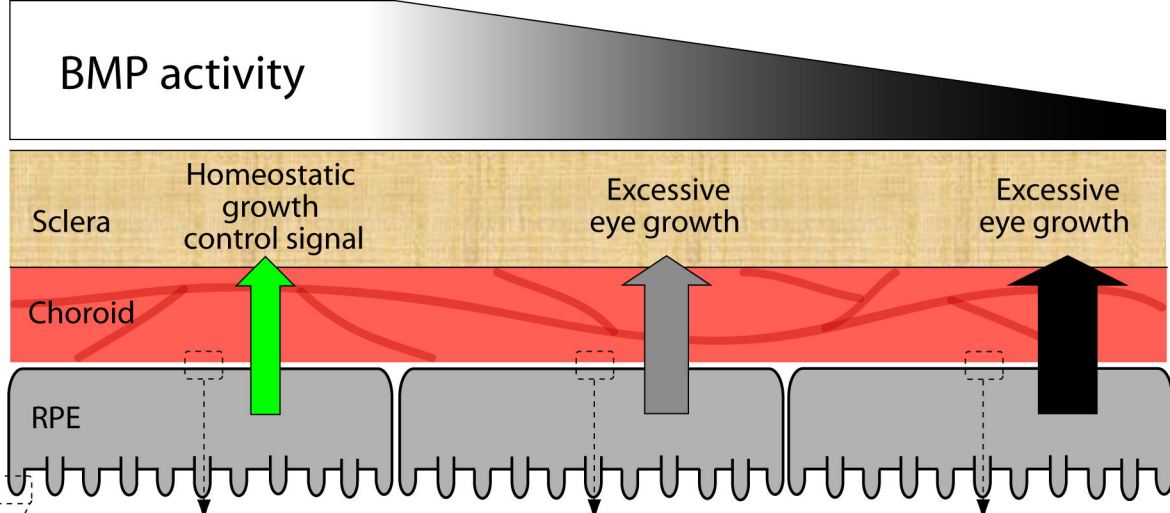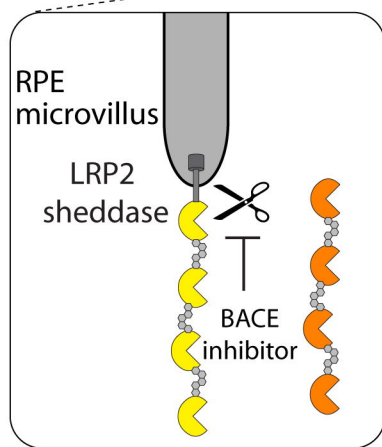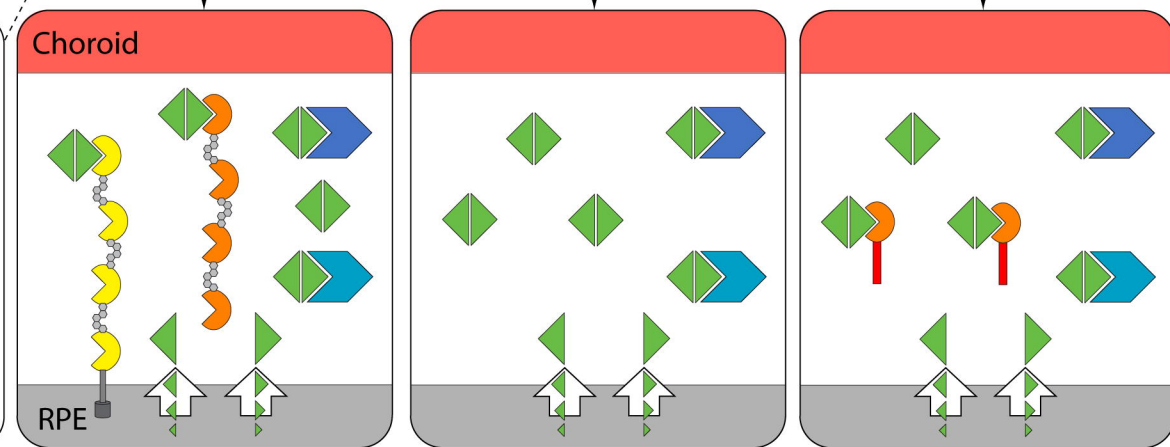

Lrp2 cleavage by BACE family member(s)

wild-type  
Membrane-bound Lrp2 facilitates Bmp signaling

*Lrp2*<sup>-/-</sup>  
Absence of Lrp2 leads to reduced Bmp signaling

*Lrp2*<sup>-/-</sup> + *rpe65a*>*LDLA1*  
Soluble Lrp2 LDLA1 acts as decoy further reducing Bmp signaling
